# Supplementary material for: Promotion mechanisms of LiBH 4 dehydrogenation dominated by charge redistribution
Source: Royal Society of Chemistry journal article supplement (doi:10.1039/d4ta06584k), 2024-11-25
Supplement: d4ta06584k1.pdf [file d4ta06584k1.pdf]

# Promotion Mechanisms of $\text{LiBH}_4$ Dehydrogenation Dominated by Charge Redistribution

Weijie Yang<sup>ab\*</sup>, Han Ge<sup>ab</sup>, Tongao Yao<sup>ab</sup>, Qiyong Chen<sup>ab</sup>, Feiyang Liu<sup>ab</sup>, Mingye Huang<sup>ab</sup>, Junwei Sun<sup>c</sup>, Shuai Dong<sup>ab</sup>, Yanfeng Liu<sup>ab</sup>, Zhengyang Gao<sup>ab</sup>

<sup>a</sup> Department of Power Engineering, North China Electric Power University, Baoding 071003, Hebei, China

<sup>b</sup> Hebei Key Laboratory of Low Carbon and High-Efficiency Power Generation Technology, North China Electric Power University, Baoding 071003, Hebei, China

<sup>c</sup> Guoneng Nanjing Electric Power Test & Research Limited

**\* Corresponding author:**

Weijie Yang ([yangwj@ncepu.edu.cn](mailto:yangwj@ncepu.edu.cn))

**Table. S1** Comparison of LiBH<sub>4</sub> lattice parameters in different literatures with this study

| Lattice parameters | a (Å) | b (Å) | c (Å) |
|--------------------|-------|-------|-------|
| Ref <sup>1</sup>   | 7.173 | 4.434 | 6.798 |
| Ref <sup>2</sup>   | 7.140 | 4.290 | 6.850 |
| Ref <sup>3</sup>   | 7.179 | 4.437 | 6.803 |
| This work          | 7.141 | 4.431 | 6.748 |

**Table. S2** K-point parameter convergence test

| k-points | Energy (Hartree) | delte E             | Judgment criteria              |
|----------|------------------|---------------------|--------------------------------|
| 1 1 1    | -50.6701286544   |                     | $ \Delta E  < 3.7 \text{ E-}5$ |
| 2 2 2    | -50.7413257909   | -0.0711971364       |                                |
| 3 3 3    | -50.7403112341   | 0.0010145568        |                                |
| 4 4 4    | -50.7403822759   | -0.0000710418       |                                |
| 5 5 5    | -50.7403802078   | <b>0.0000020681</b> |                                |
| 6 6 6    | -50.7403785245   | 0.0000016833        |                                |

**Table. S3** Cutoff parameter convergence test

| Cutoff (Ry) | Energy (Hartree) | delte E              | Judgment criteria            |
|-------------|------------------|----------------------|------------------------------|
| 100         | -48.5668527094   |                      | $ \Delta E  < 1 \text{ E-}6$ |
| 150         | -48.5214733688   | 0.0453793406         |                              |
| 200         | -48.5007221546   | 0.0207512142         |                              |
| 250         | -48.5002418168   | 0.0004803378         |                              |
| 300         | -48.5001332759   | 0.0001085409         |                              |
| 350         | -48.5001273850   | 0.0000058909         |                              |
| 400         | -48.5001276498   | <b>-0.0000002648</b> |                              |

**Table. S4** The expansion multiples of different surfaces and the test values of cutoff and rel-cutoff

| surface | cell expansion multiples | cutoff (Ry) | rel-cutoff (Ry) |
|---------|--------------------------|-------------|-----------------|
| (002)   | 241                      | 700         | 60              |
| (020)   | 321                      | 650         | 70              |
| (011)   | 331                      | 700         | 60              |
| (200)   | 331                      | 800         | 50              |
| (101)   | 251                      | 1000        | 50              |
| (111)   | 331                      | 550         | 60              |

**Table. S5** Crystal cell parameters and atomic counts after expansion for the six different surfaces of LiBH<sub>4</sub>

| surface | a (Å)   | b (Å)   | c (Å)  | $\alpha$ (°) | $\beta$ (°) | $\gamma$ (°) | number of atoms | cell type    |
|---------|---------|---------|--------|--------------|-------------|--------------|-----------------|--------------|
| (002)   | 14.282  | 17.724  | 32.960 | 90           | 90          | 90           | 384             | orthorhombic |
| (020)   | 20.244  | 14.282  | 24.357 | 90           | 90          | 90           | 288             | orthorhombic |
| (011)   | 21.423  | 24.218  | 21.362 | 90           | 90          | 90           | 432             | orthorhombic |
| (200)   | 13.292  | 20.244  | 31.908 | 90           | 90          | 90           | 432             | orthorhombic |
| (101)   | 19.650  | 22.155  | 23.850 | 90           | 90          | 90           | 480             | orthorhombic |
| (111)   | 25.2121 | 24.2182 | 26.223 | 90           | 90          | 106.82       | 432             | monoclinic   |

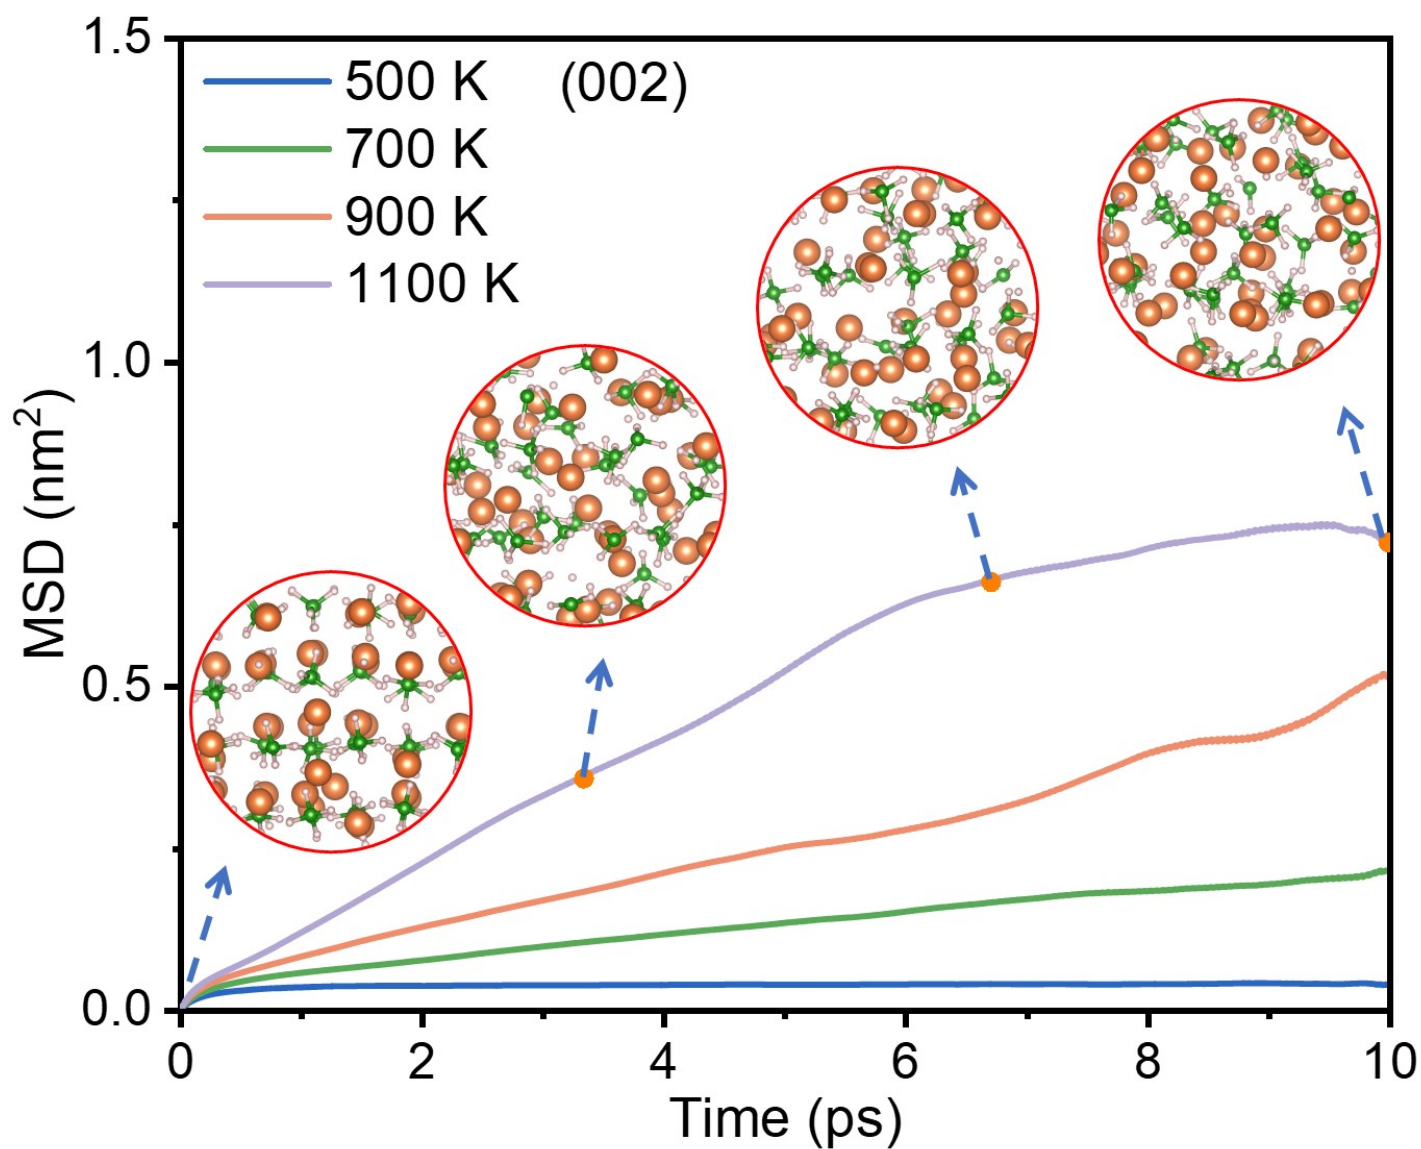**Fig. S1** The MSD changes of hydrogen atoms at different temperatures for the LiBH<sub>4</sub> (002).

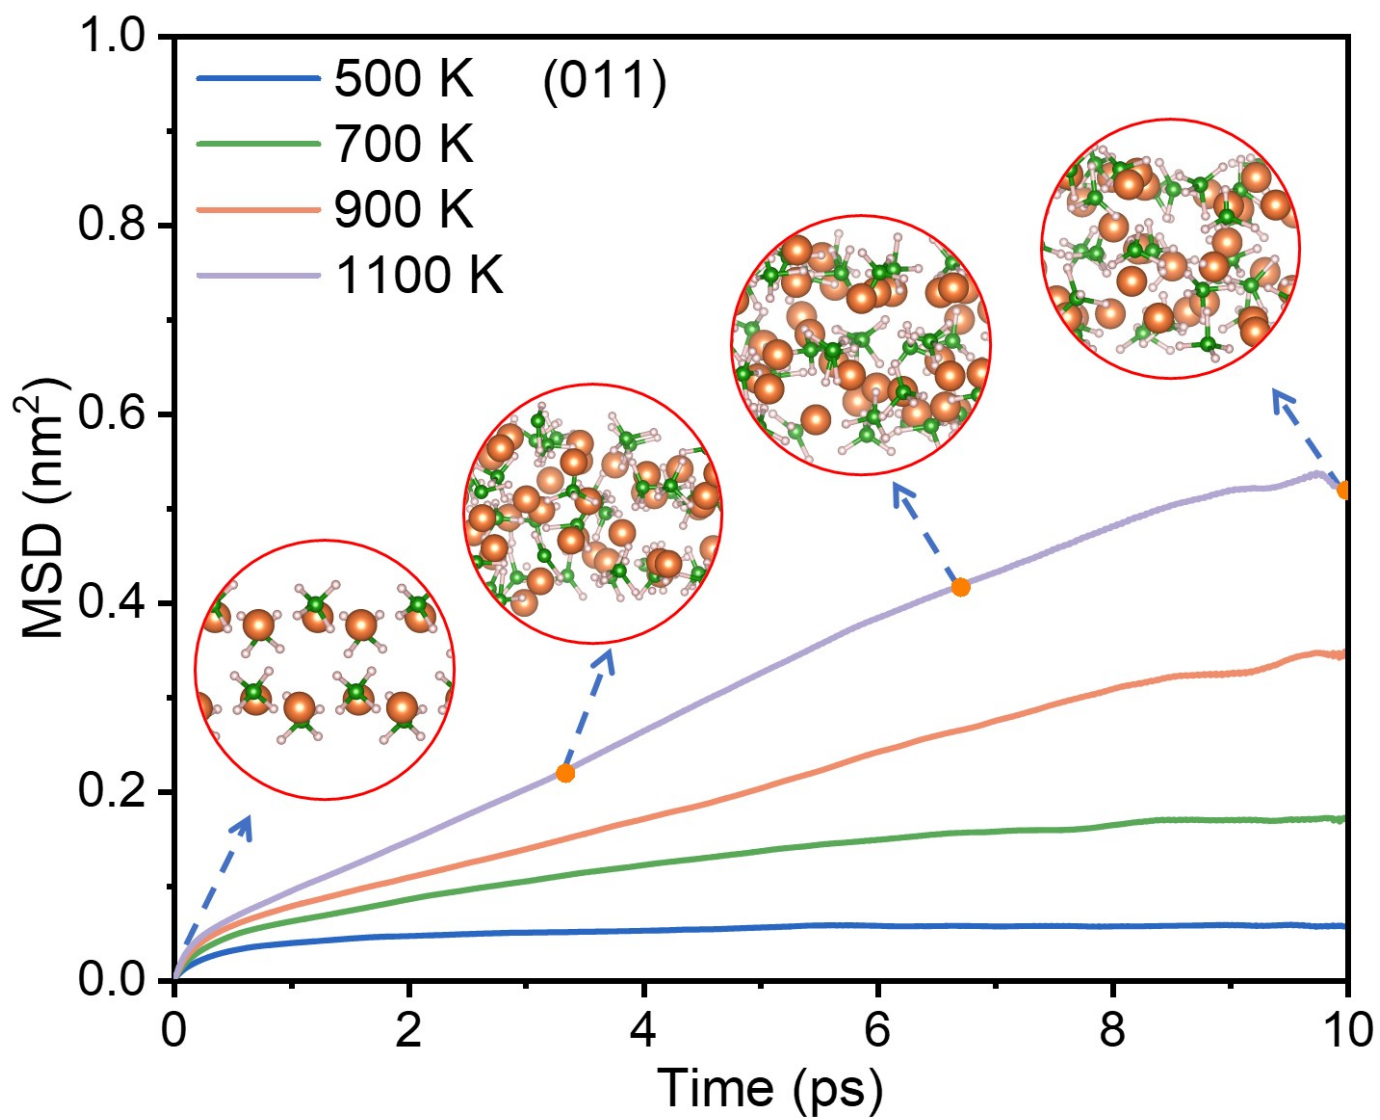

**Fig. S2** The MSD curves of hydrogen atoms at different temperatures for the LiBH<sub>4</sub> (011).

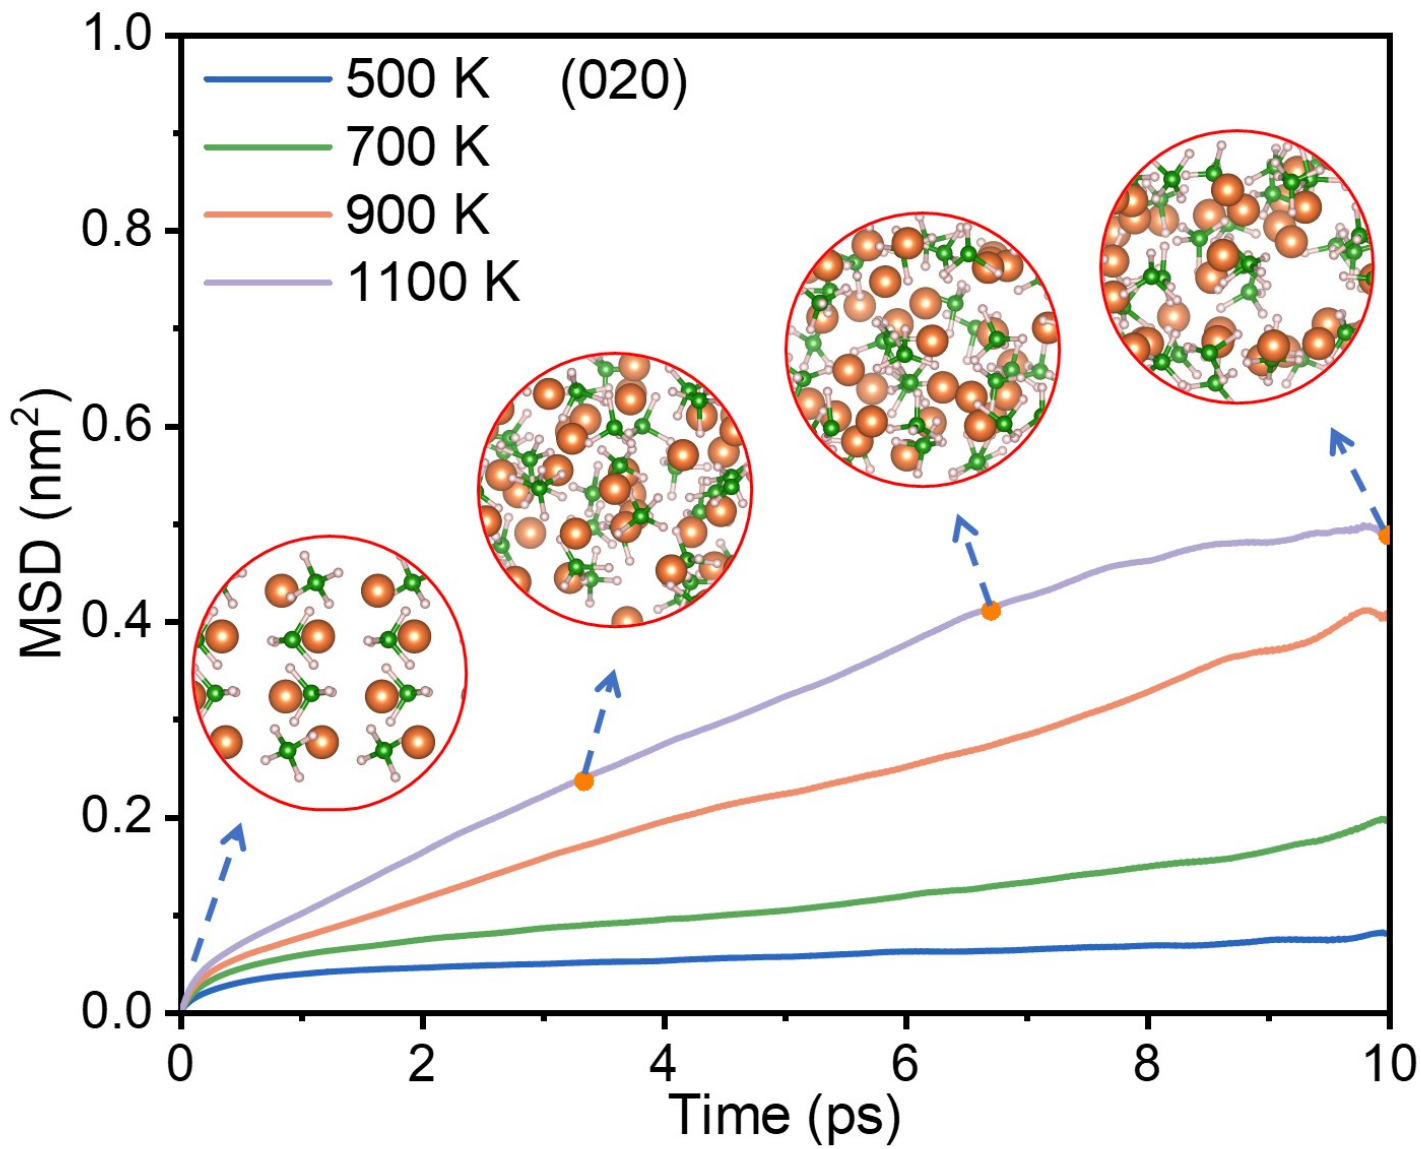

Fig. S3 The MSD curves of hydrogen atoms at different temperatures for the LiBH<sub>4</sub> (020).

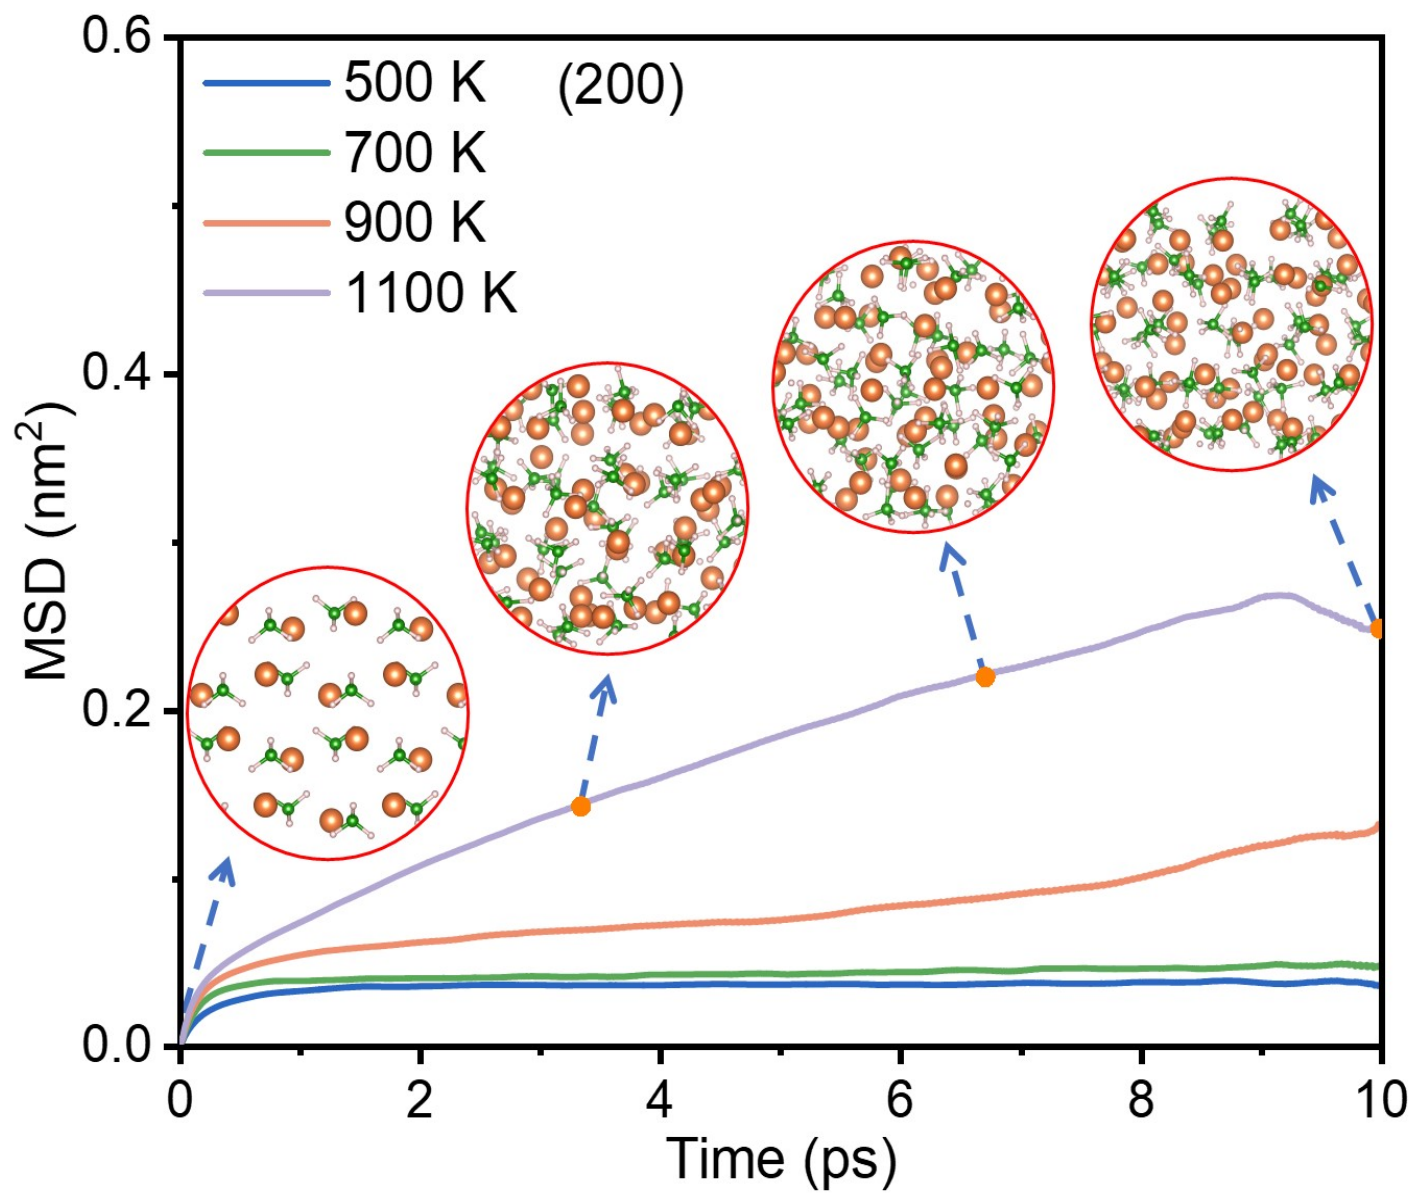

Fig. S4 The MSD curves of hydrogen atoms at different temperatures for the LiBH<sub>4</sub> (200).



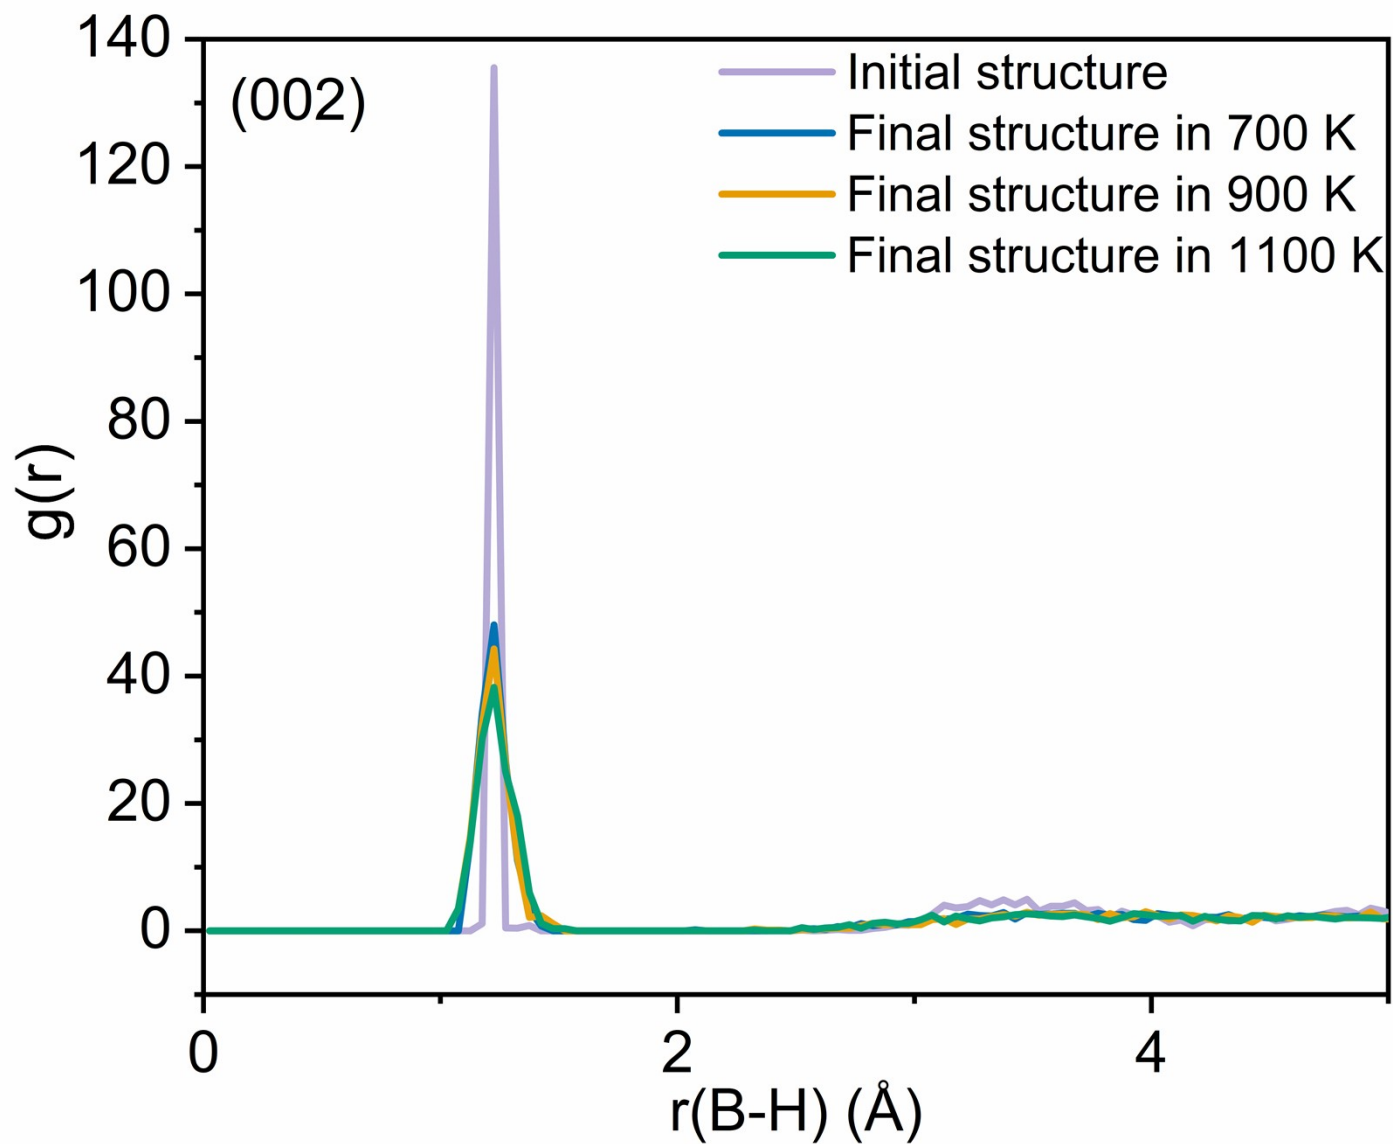

**Fig. S5** RDF of B-H of initial and final structures of 10000fs at different temperatures for the  $\text{LiBH}_4$  (002) surface.

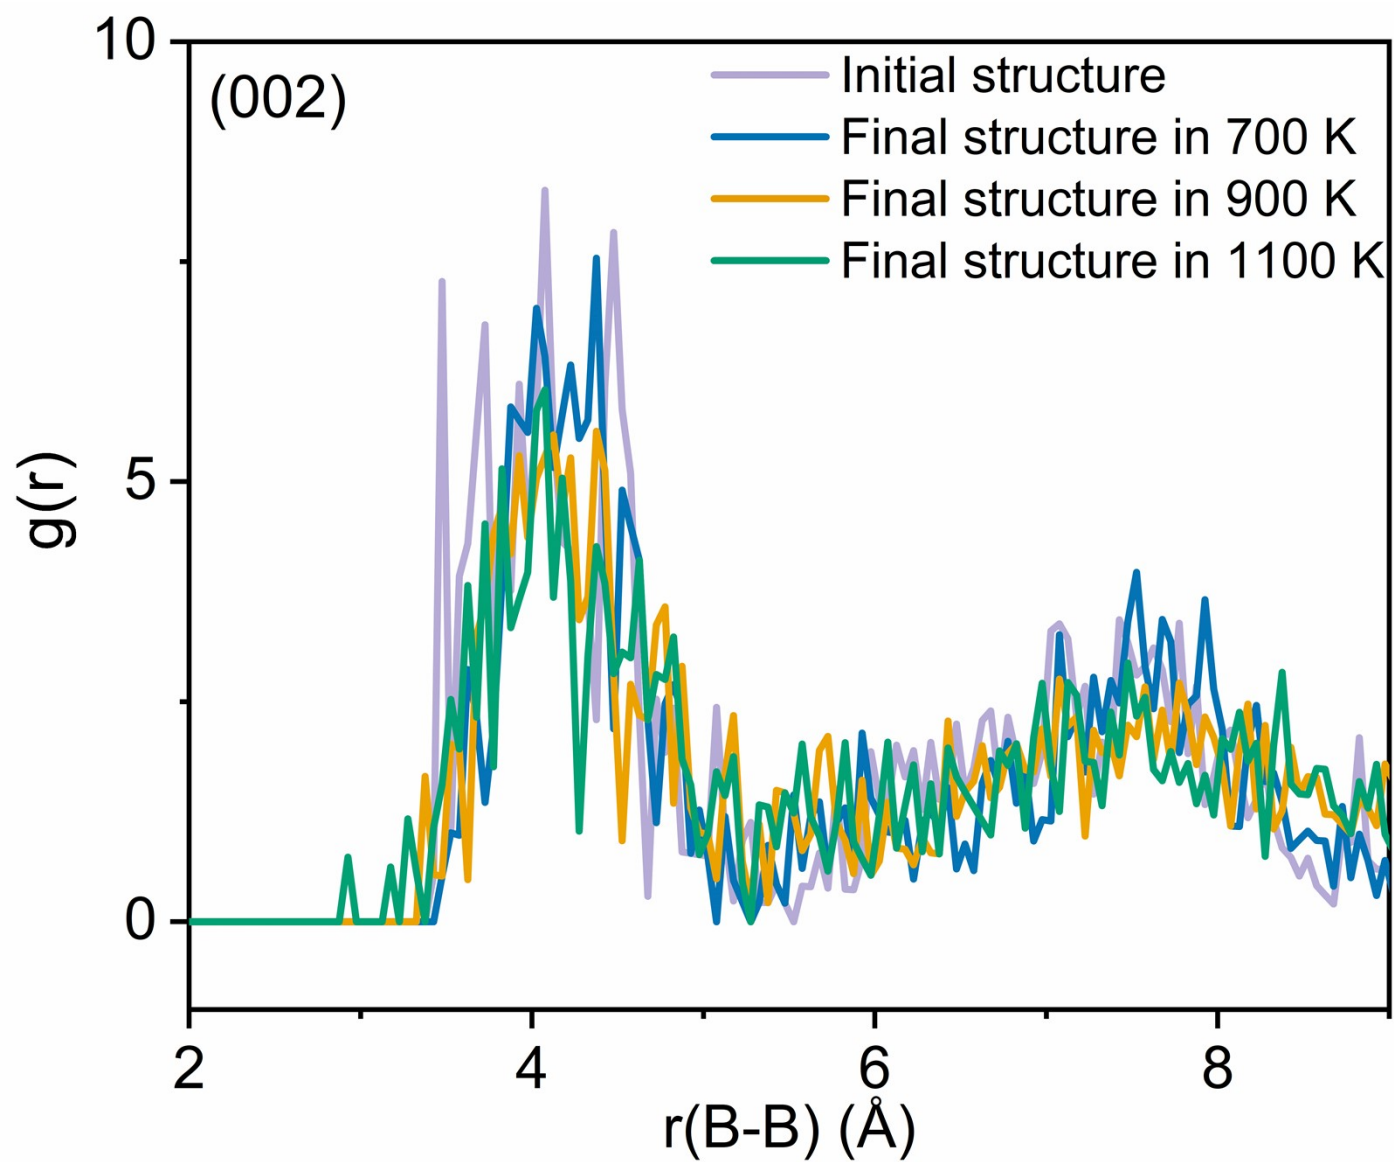

**Fig. S6** RDF of B-B of initial and final structures of 10000fs at different temperatures for the  $\text{LiBH}_4$  (002) surface.



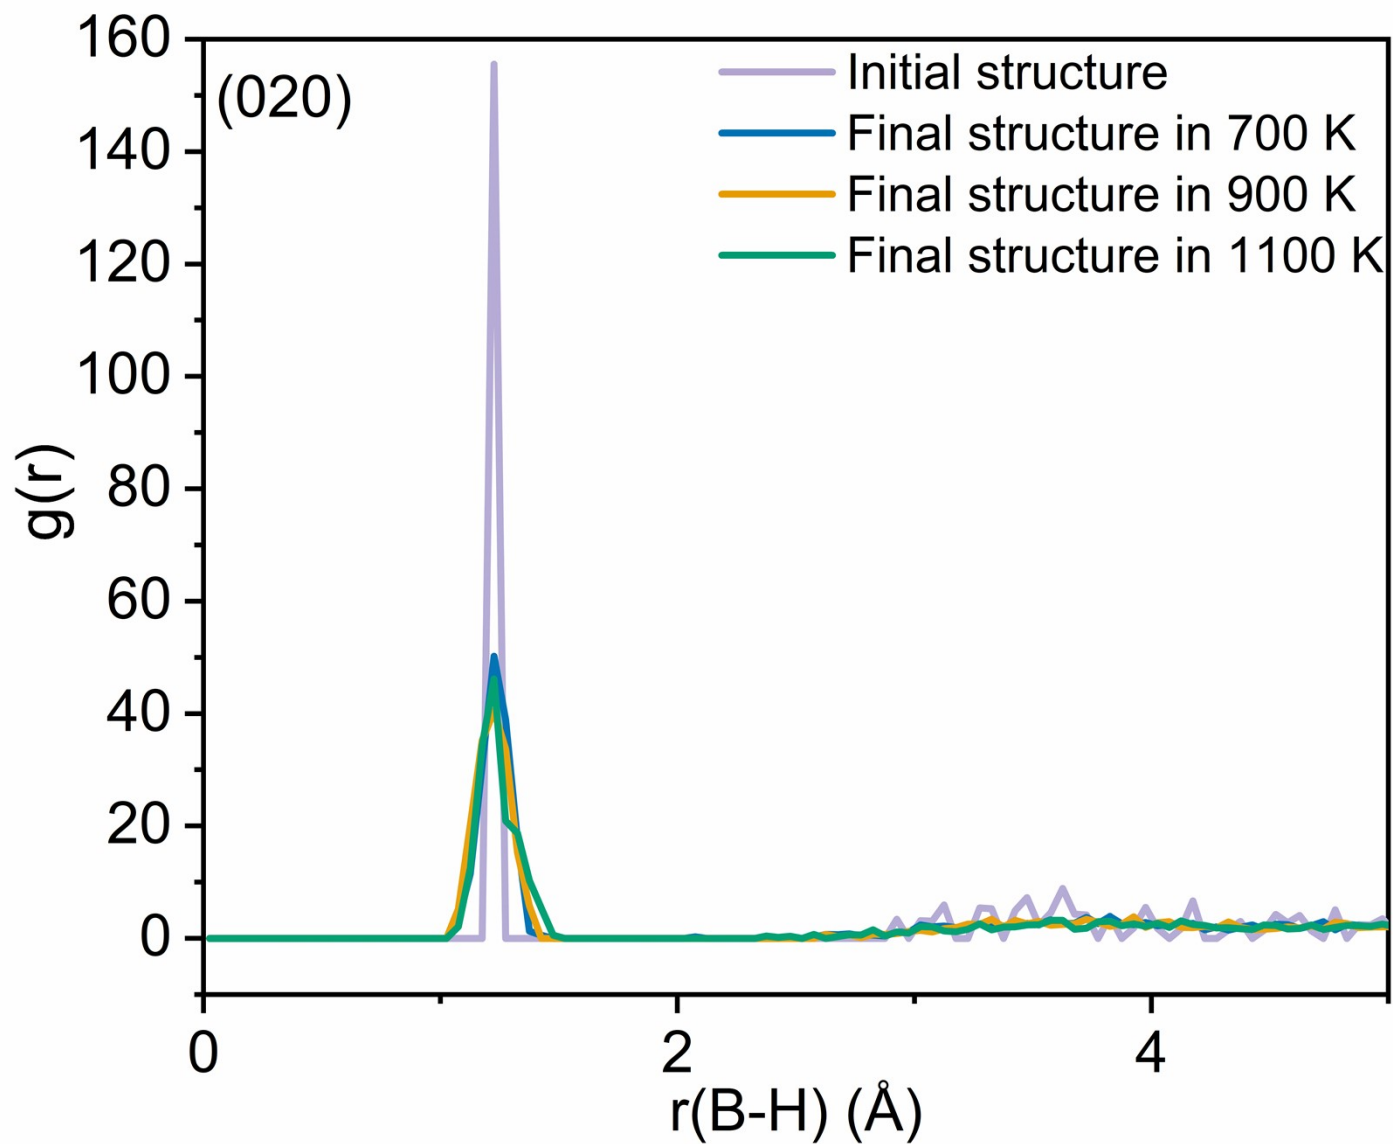

**Fig. S7** RDF of B-H of initial and final structures of 10000fs at different temperatures for the  $\text{LiBH}_4$  (020) surface.

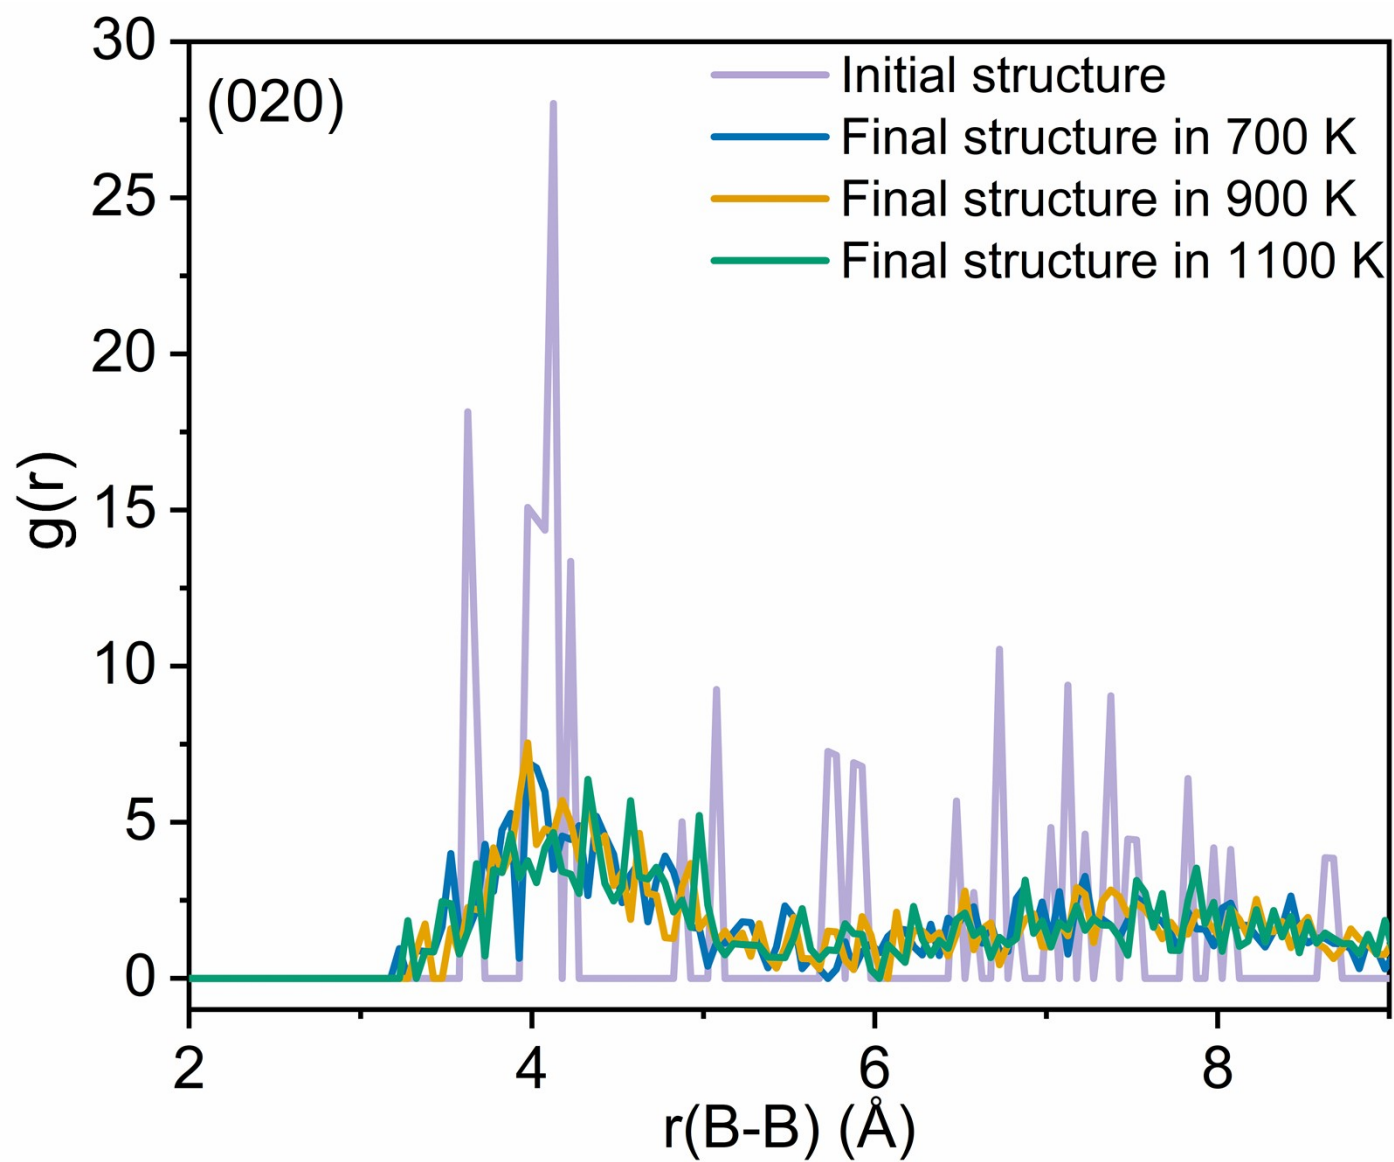

**Fig. S8** RDF of B-B of initial and final structures of 10000fs at different temperatures for the  $\text{LiBH}_4$  (020) surface.

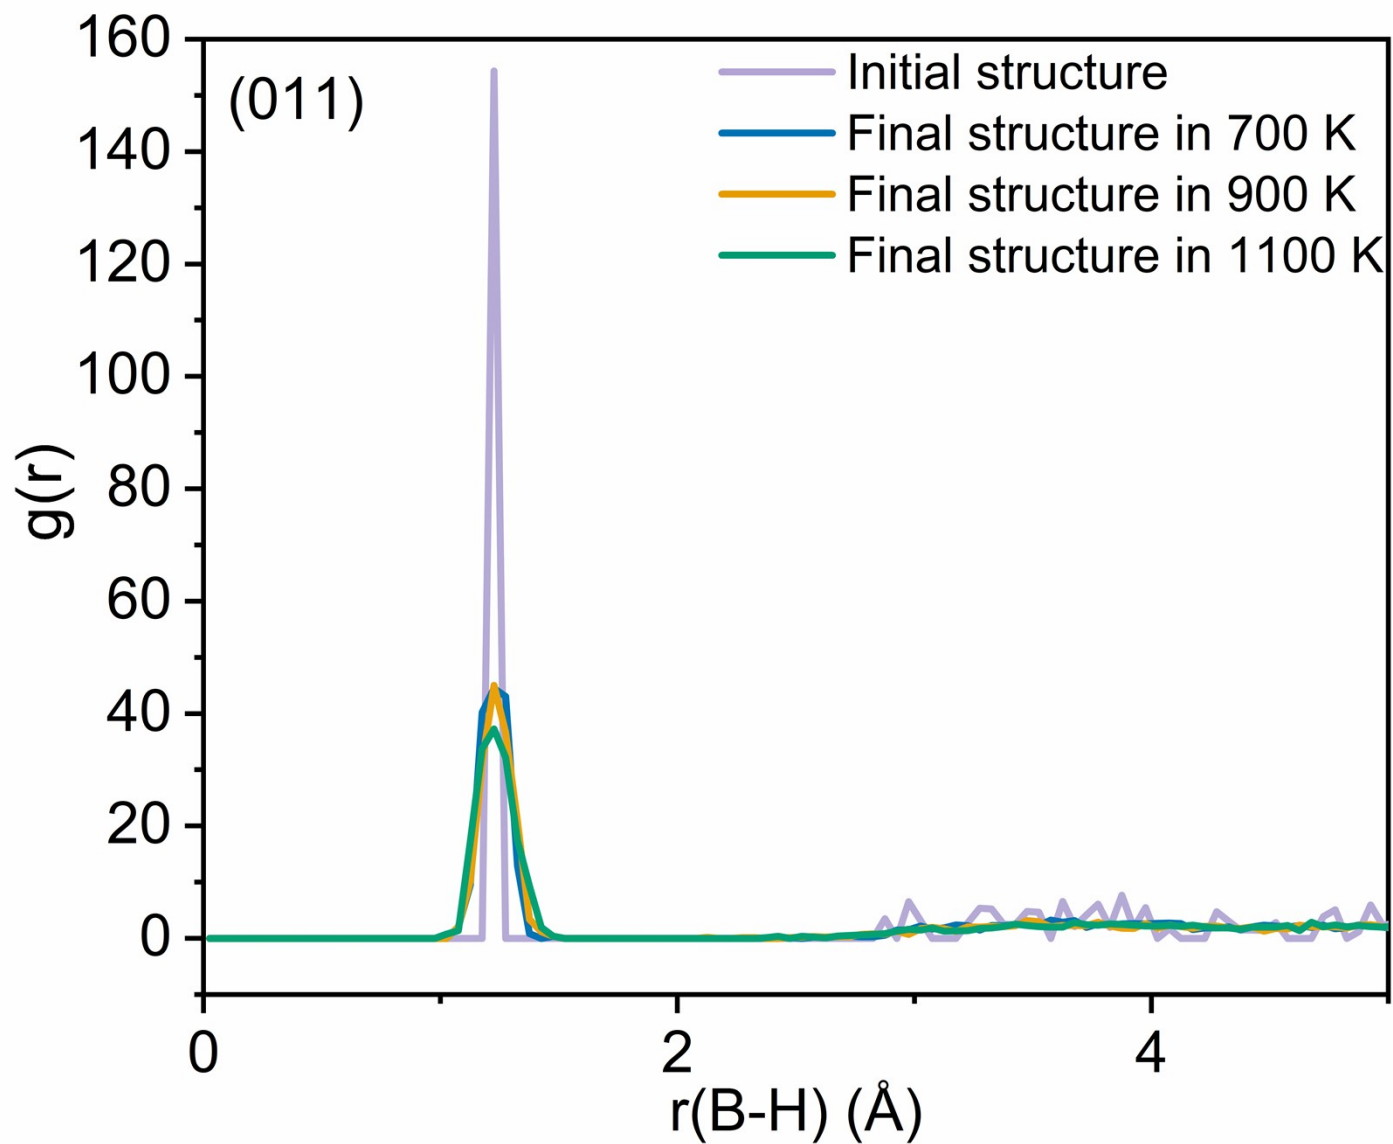

**Fig. S9** RDF of B-H of initial and final structures of 10000fs at different temperatures for the  $\text{LiBH}_4$  (011) surface.

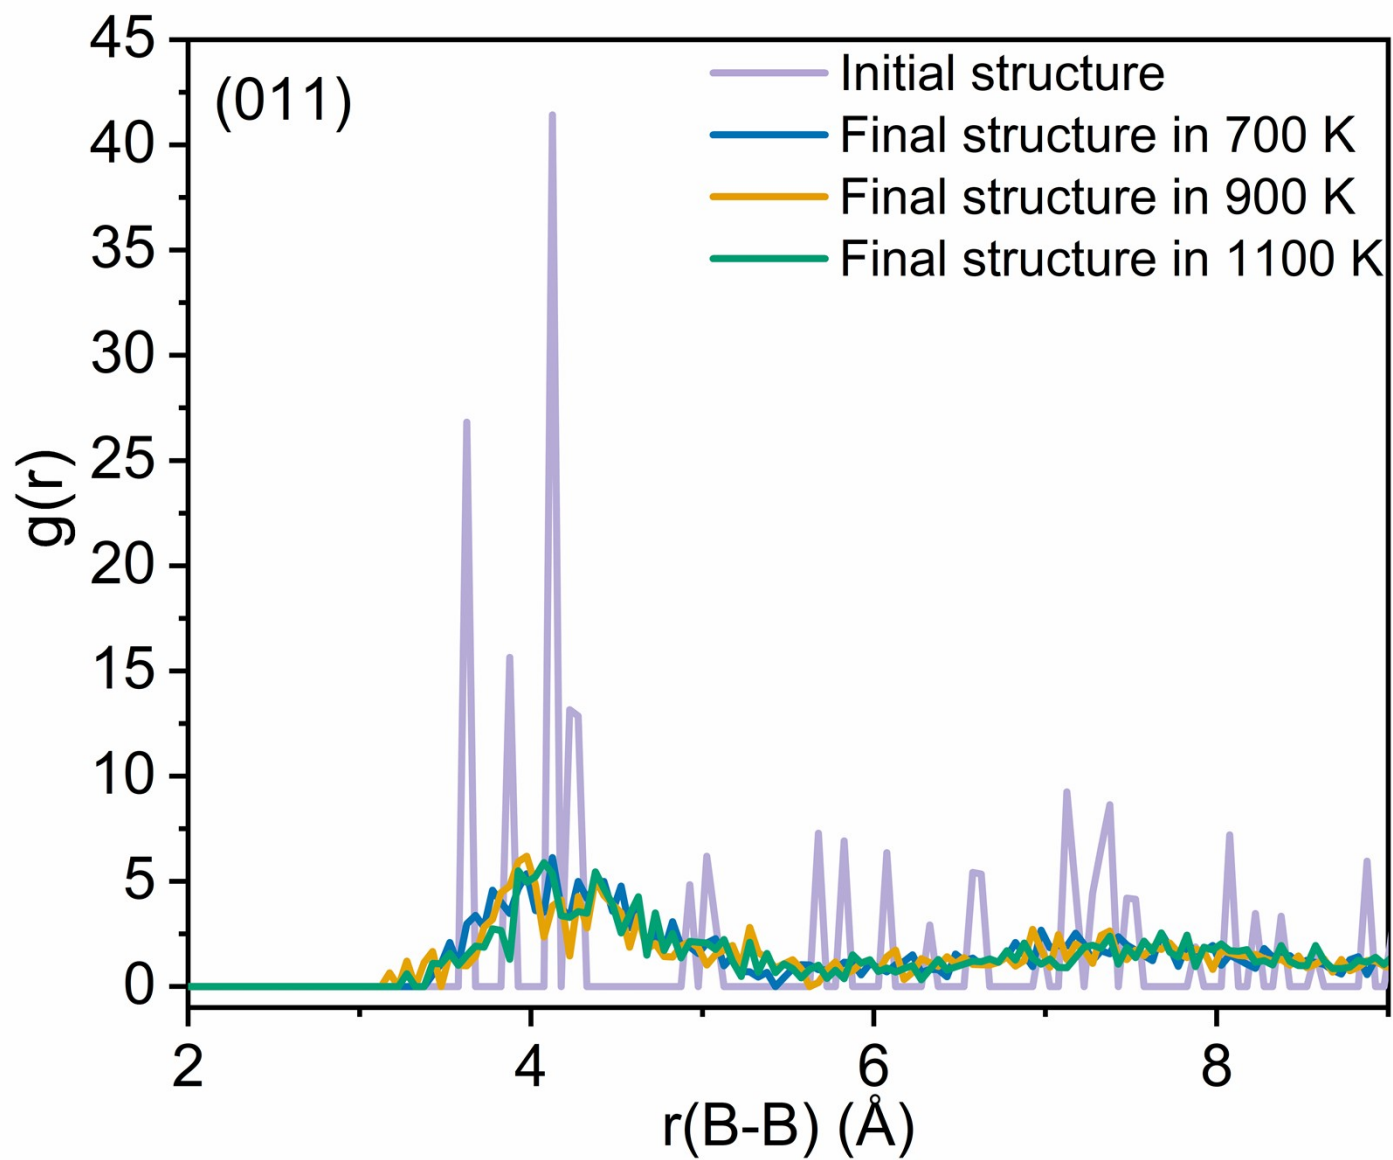

**Fig. S10** RDF of B-B of initial and final structures of 10000fs at different temperatures for the LiBH<sub>4</sub> (011) surface.

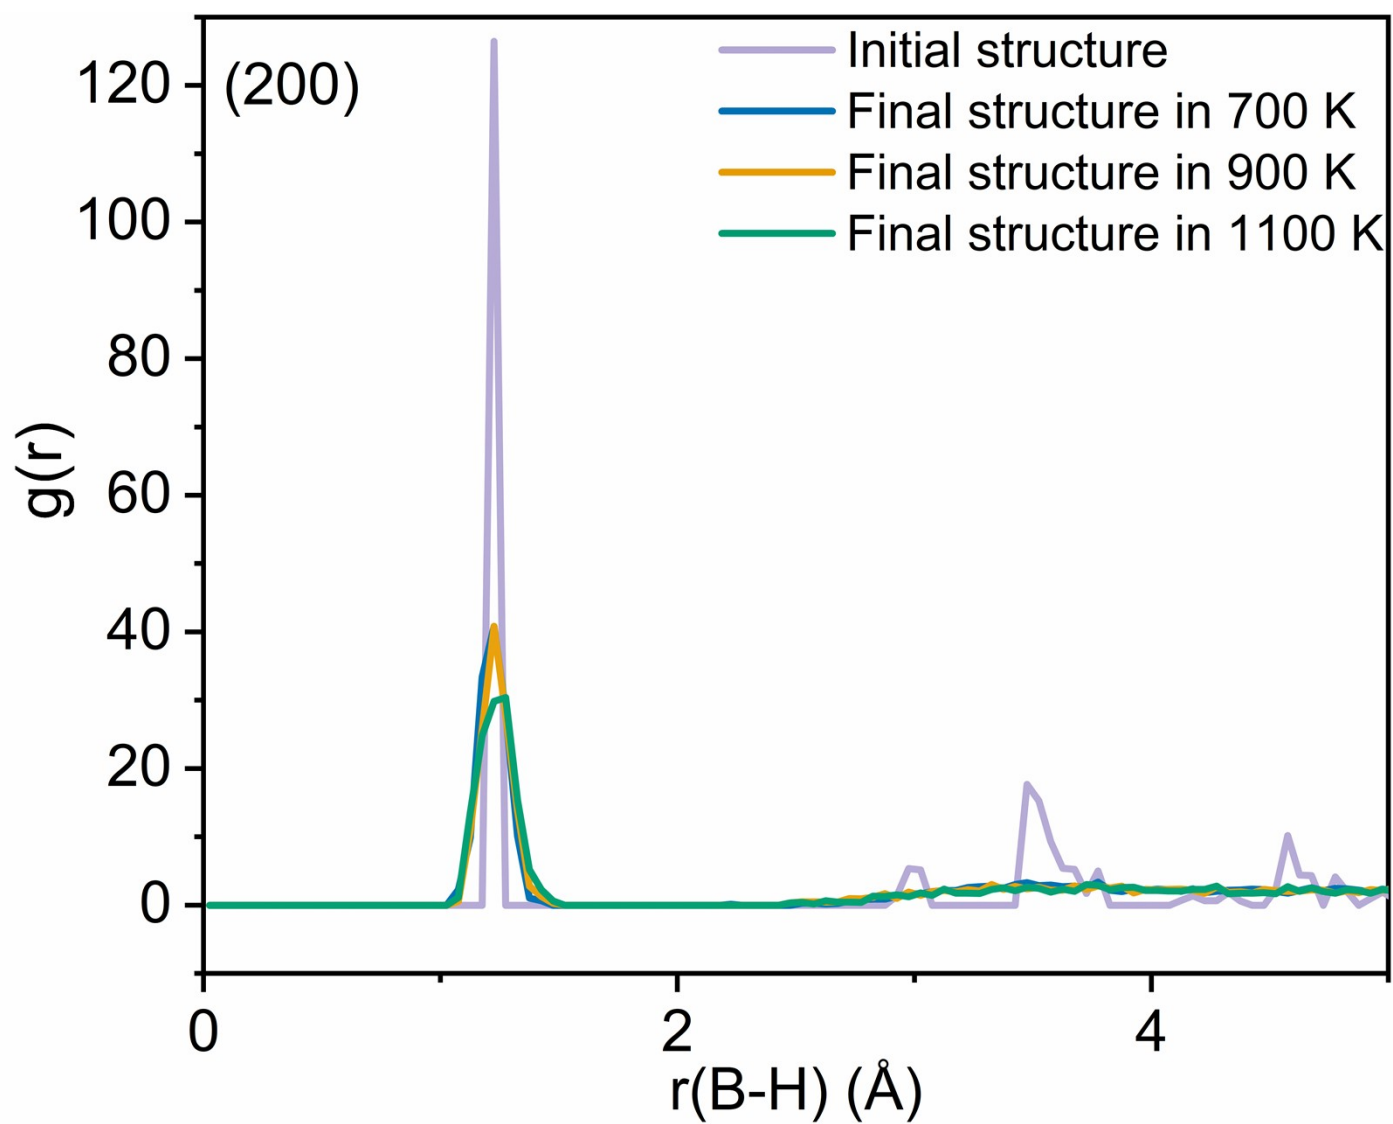

**Fig. S11** RDF of B-H of initial and final structures of 10000fs at different temperatures for the  $\text{LiBH}_4$  (200) surface.

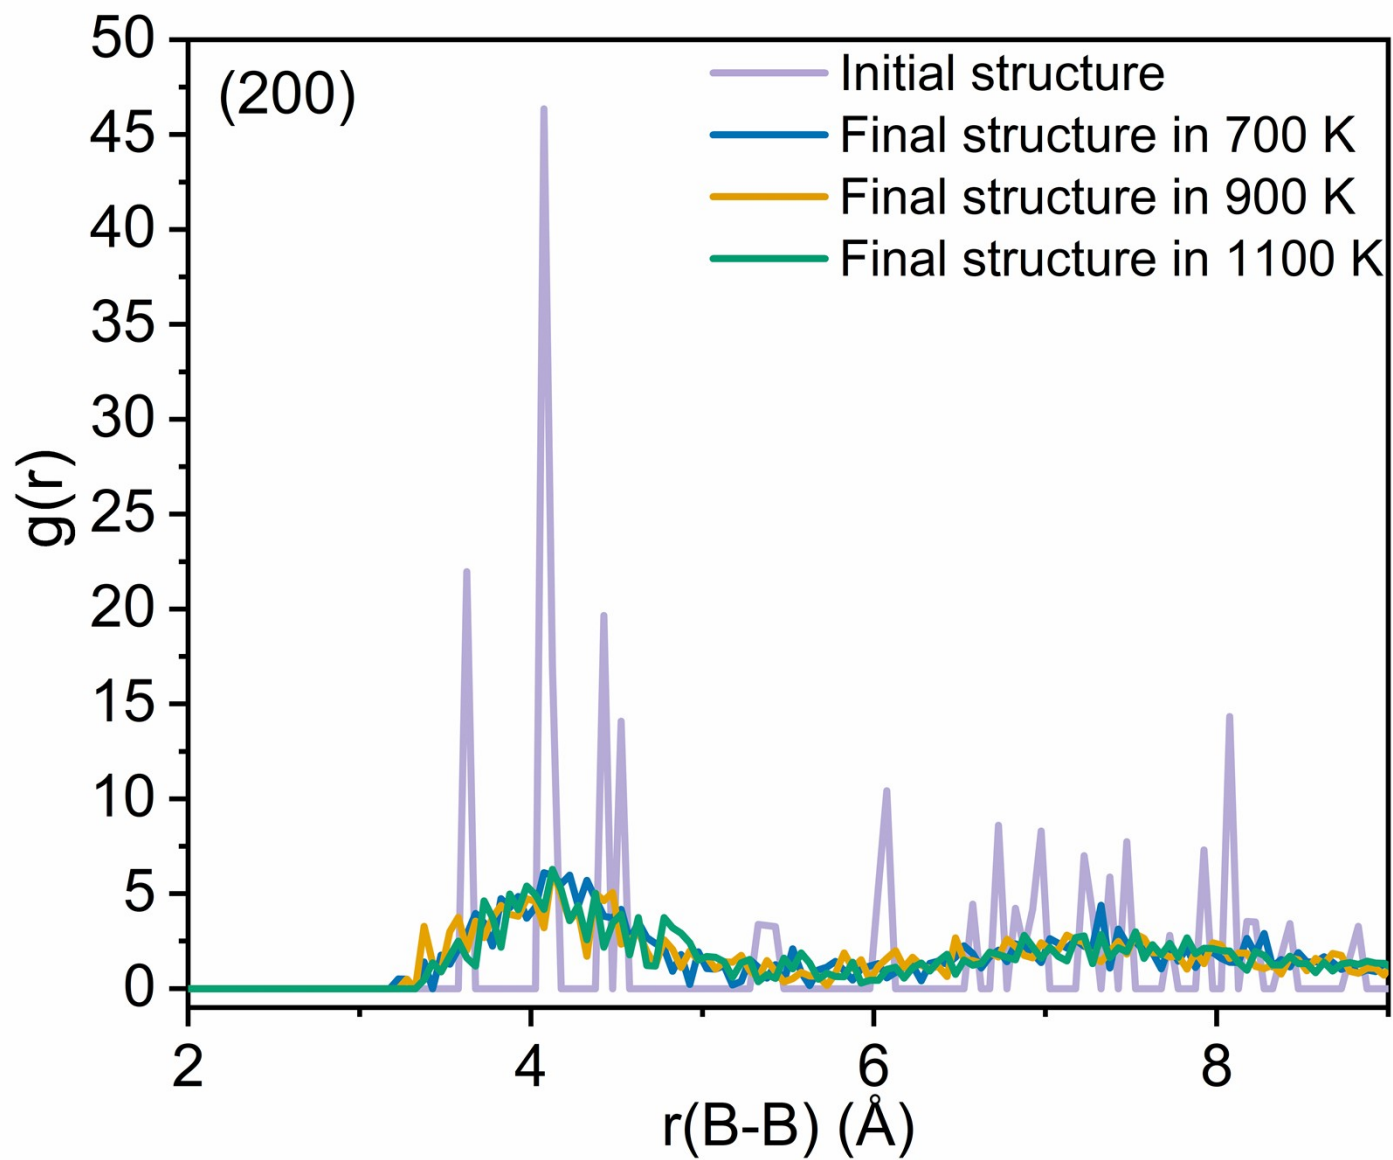

**Fig. S12** RDF of B-B of initial and final structures of 10000fs at different temperatures for the  $\text{LiBH}_4$  (200) surface.



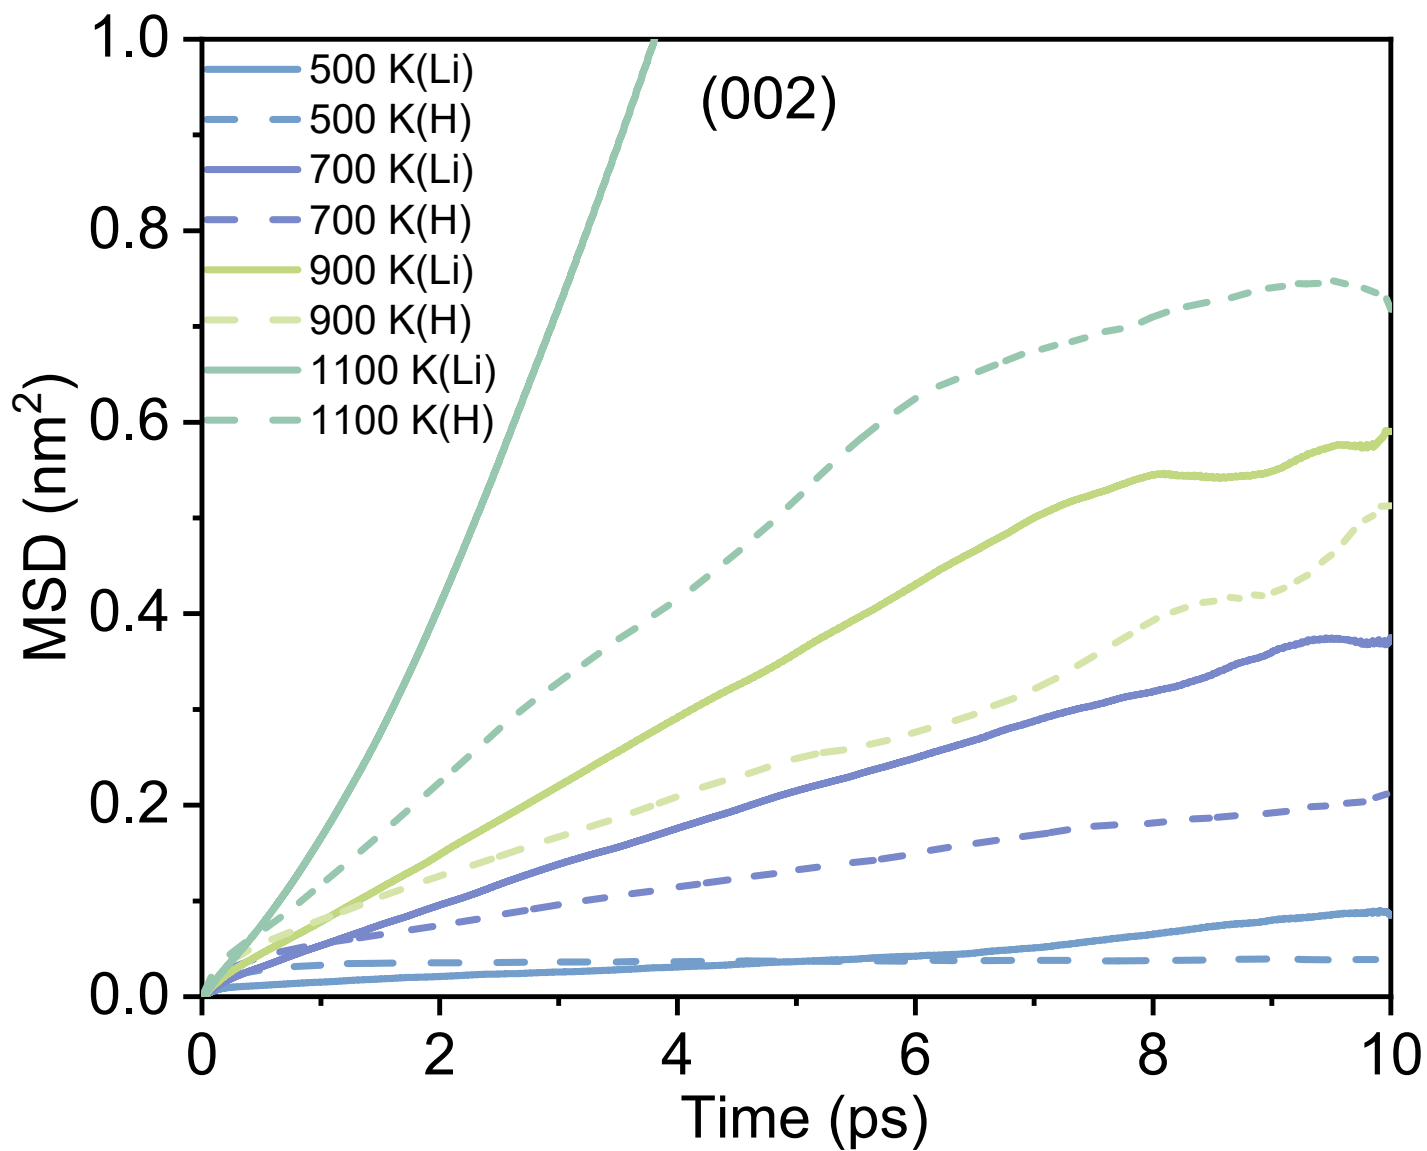

**Fig. S13** The MSD curves of both Li and H along with time at different temperatures for the (002). The dashed line represents the variation of H, while the solid line represents the variation of Li.

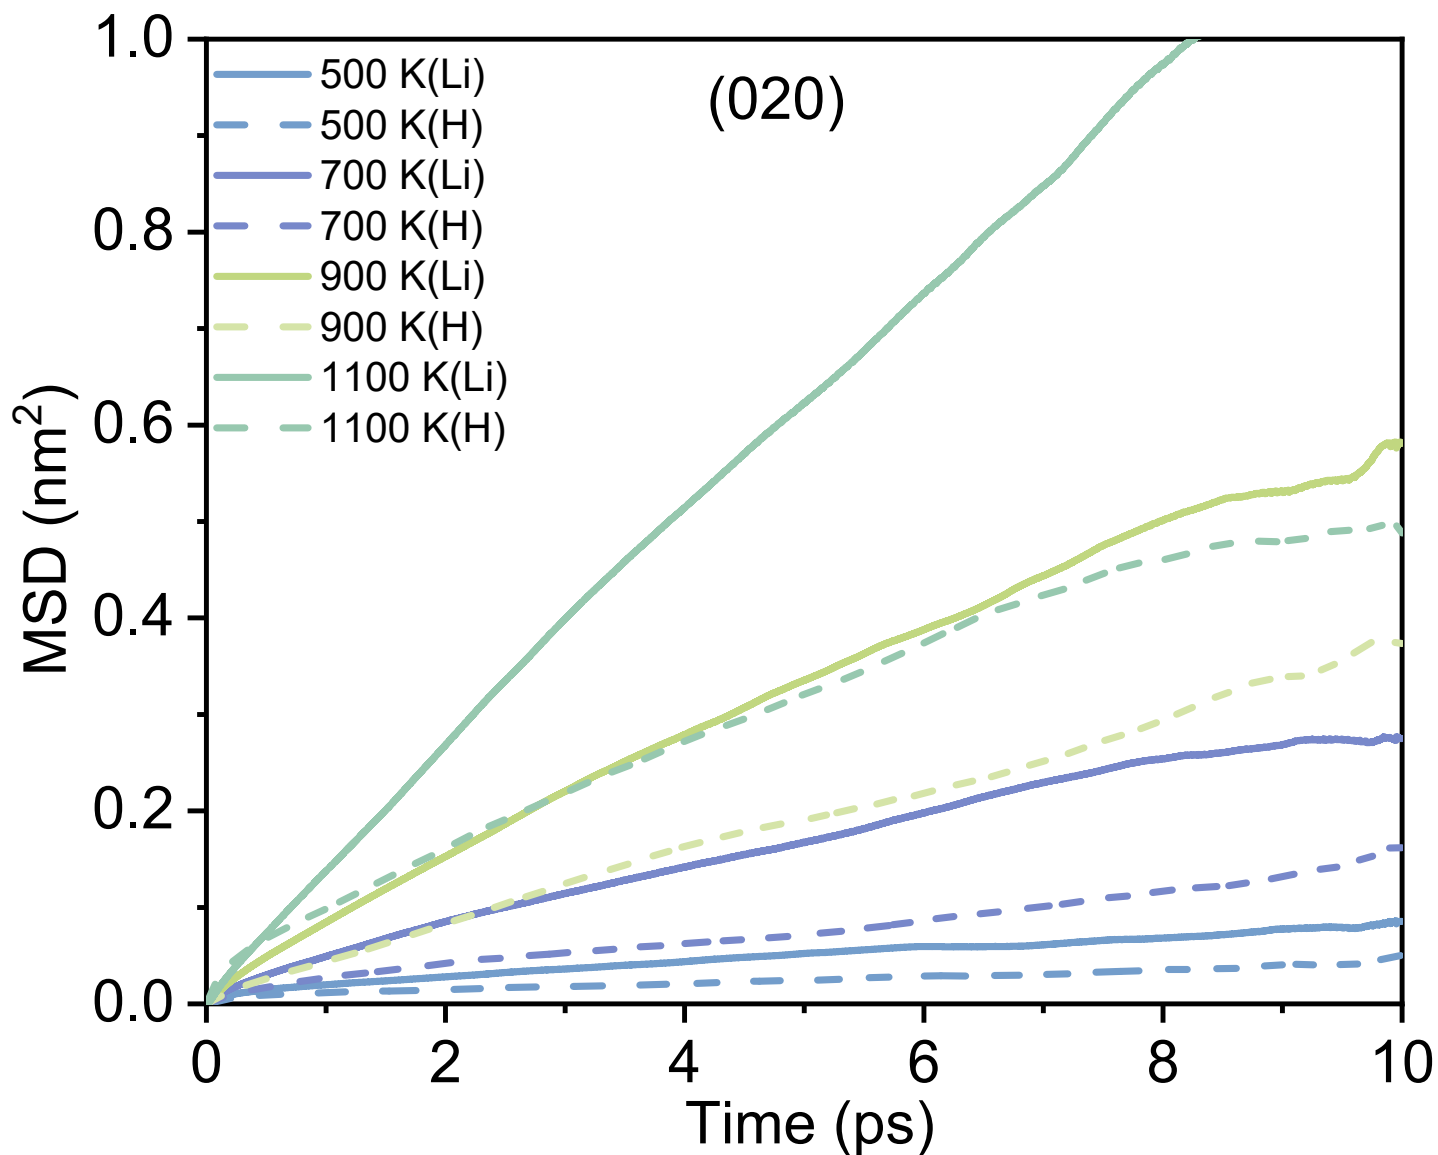

**Fig. S14** The MSD curves of both Li and H along with time at different temperatures for the (020) surface. The dashed line represents the variation of H, while the solid line represents the variation of Li.

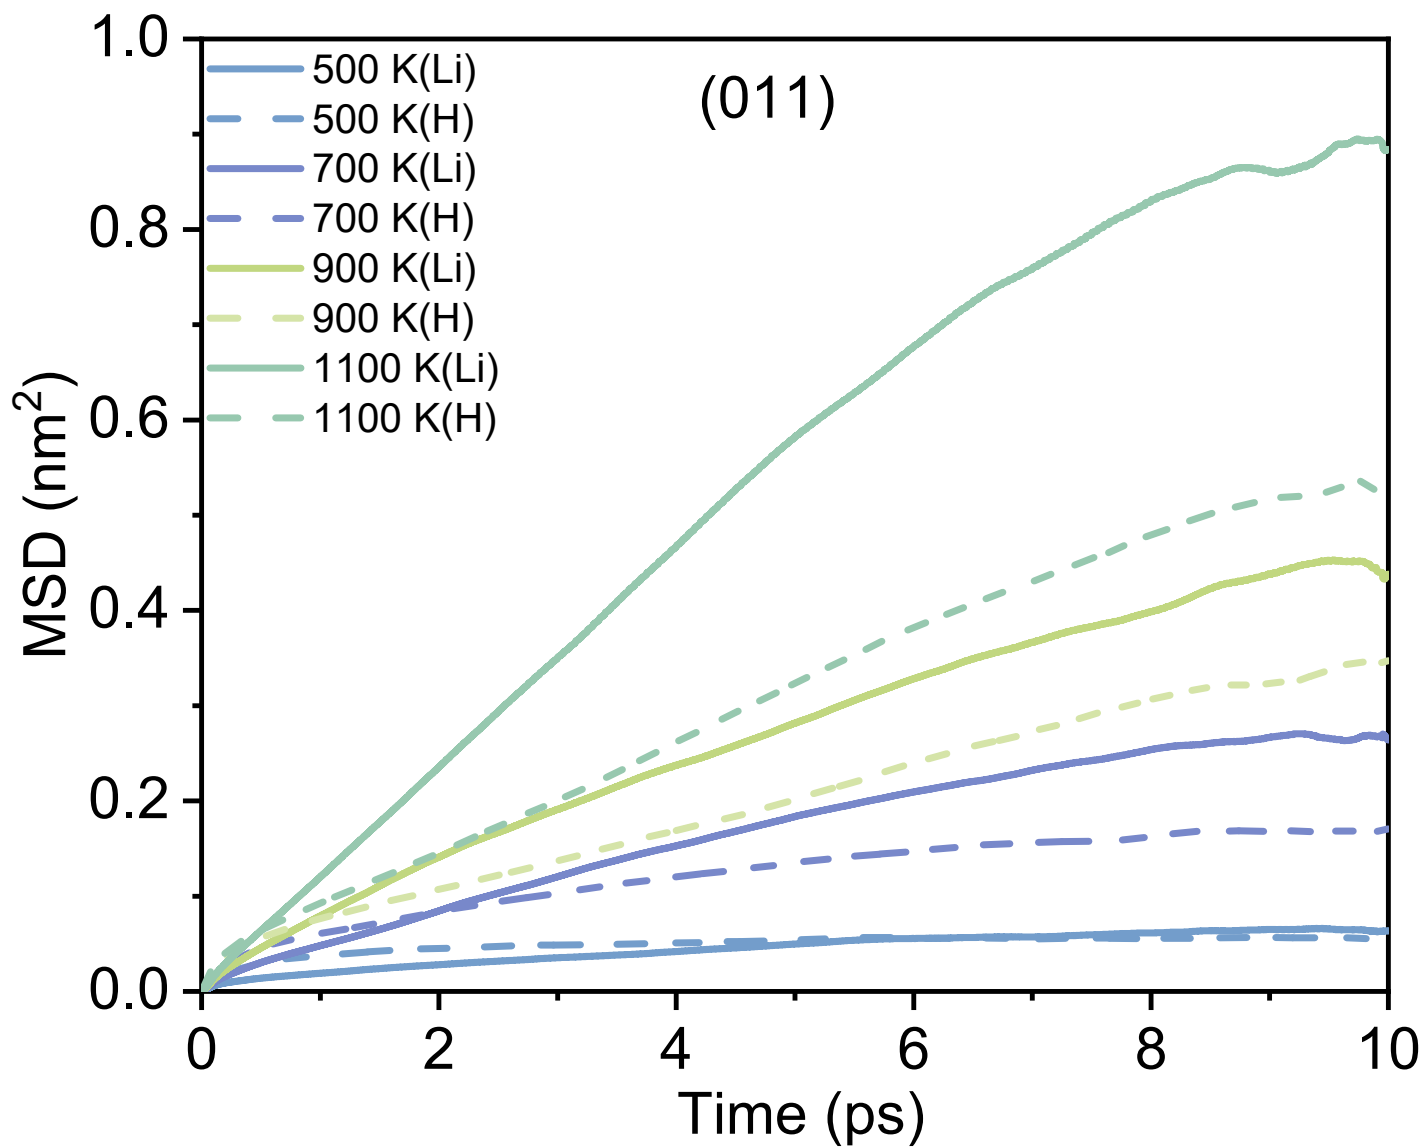

**Fig. S15** The MSD curves of both Li and H along with time at different temperatures for the (011) surface. The dashed line represents the variation of H, while the solid line represents the variation of Li.

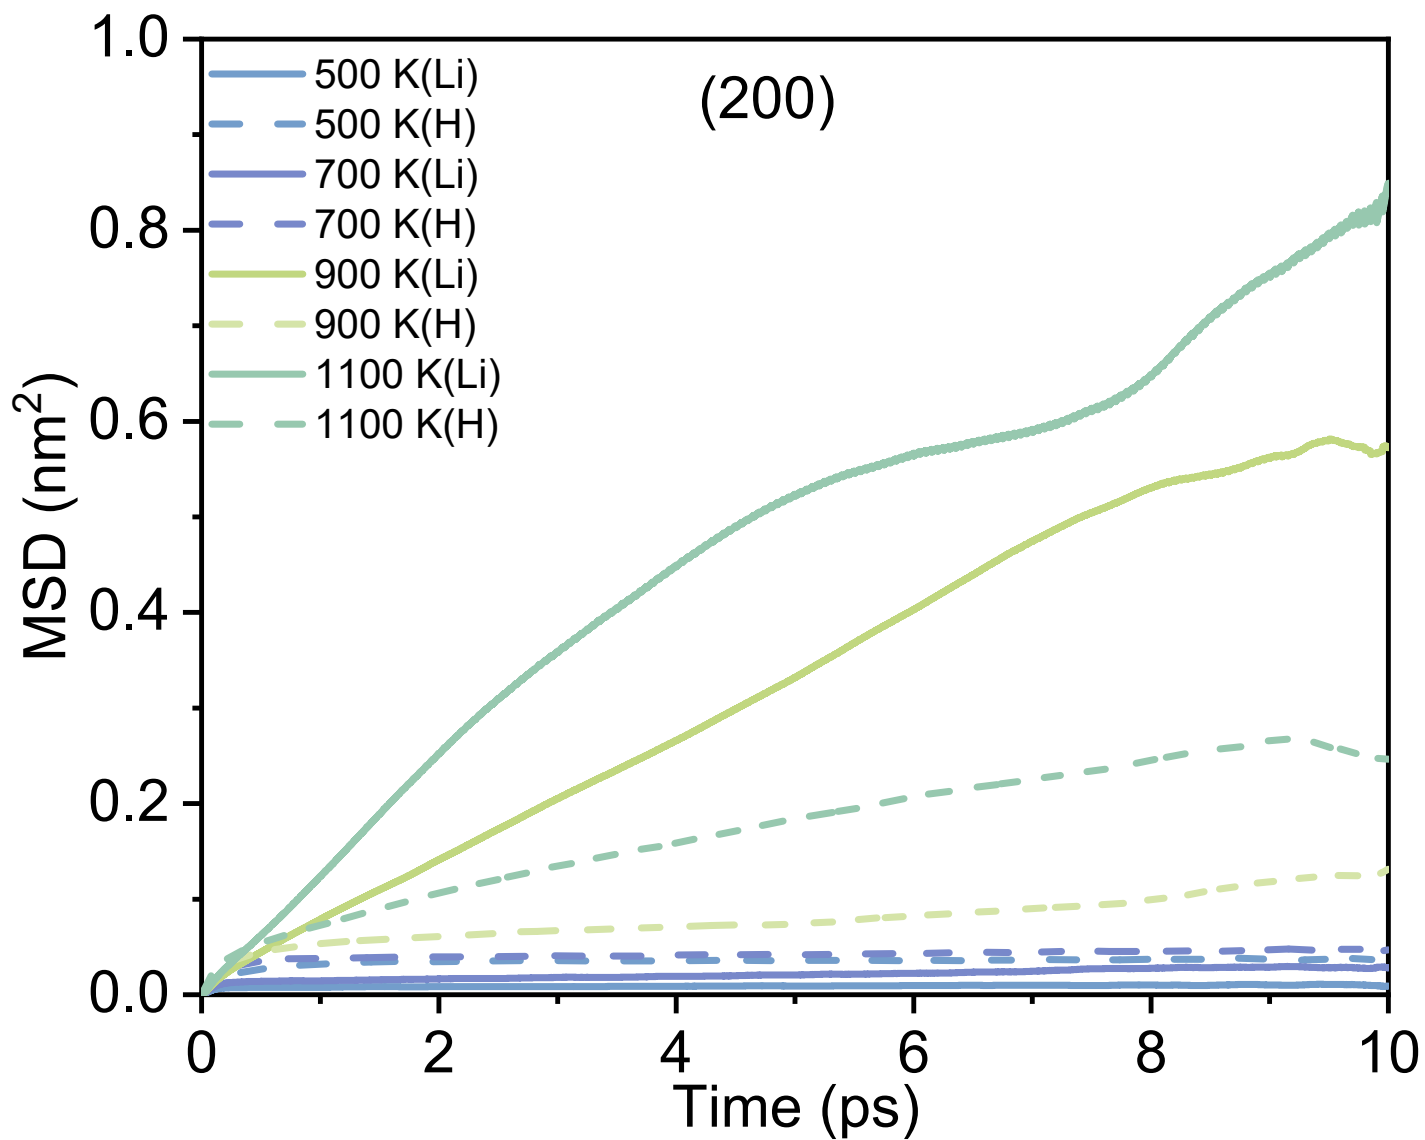

**Fig. S16** The MSD curves of both Li and H along with time at different temperatures for the (200) surface. The dashed line represents the variation of H, while the solid line represents the variation of Li.

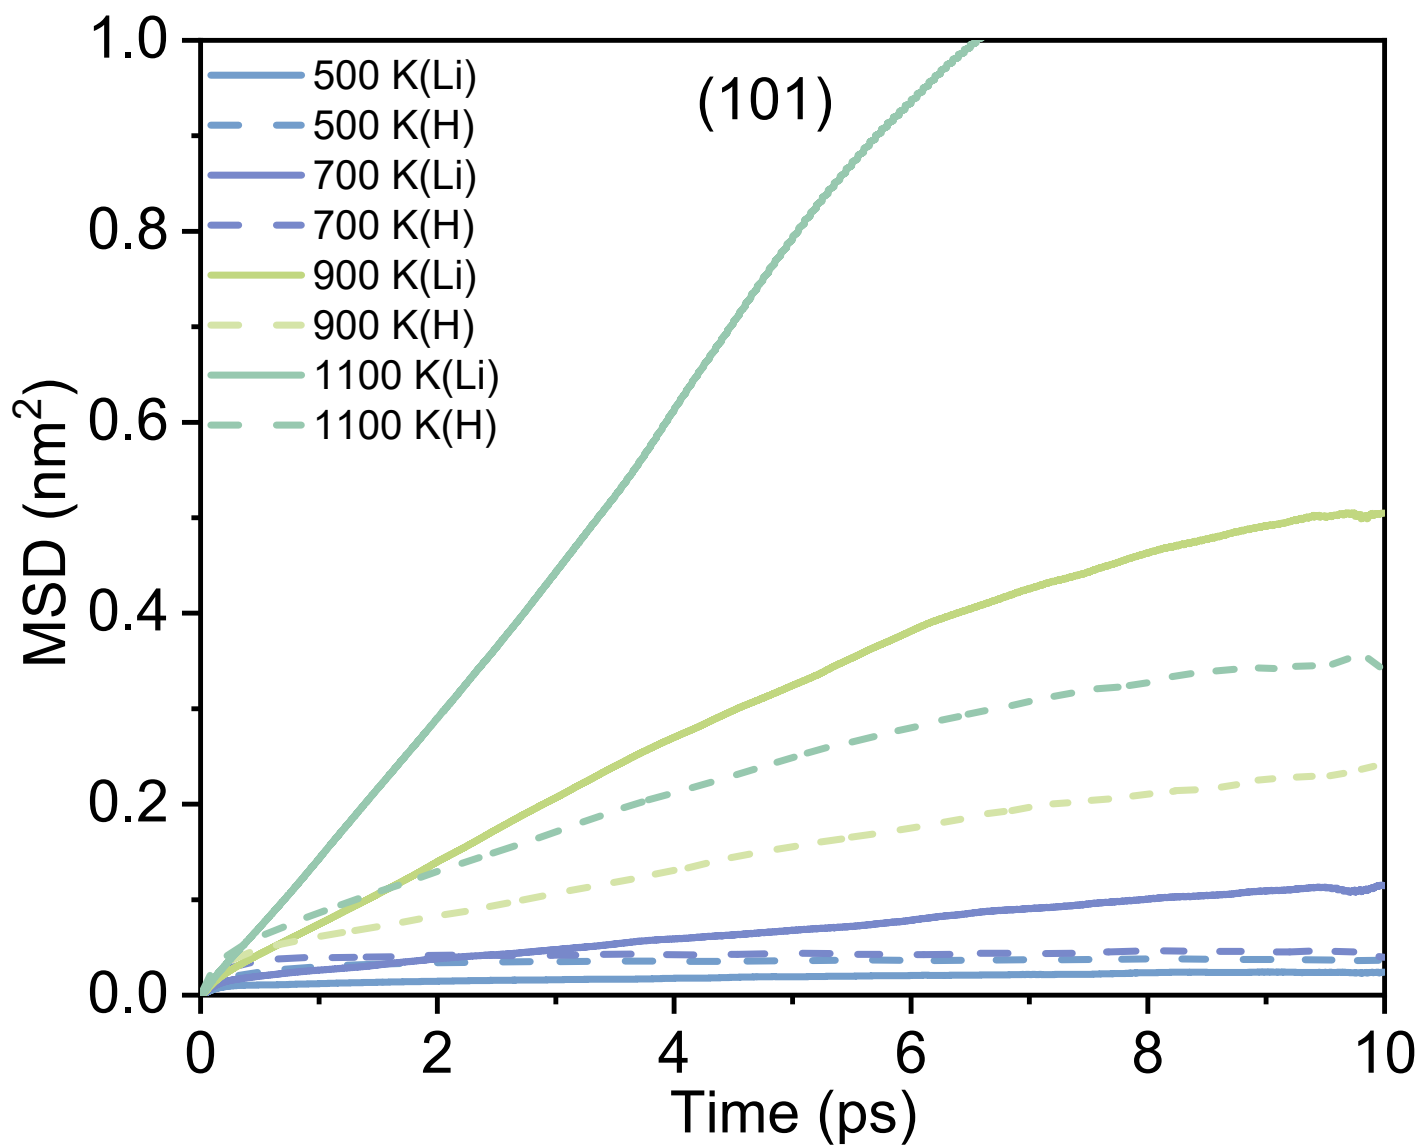

**Fig. S17** The MSD curves of both Li and H along with time at different temperatures for the (101) surface. The dashed line represents the variation of H, while the solid line represents the variation of Li.

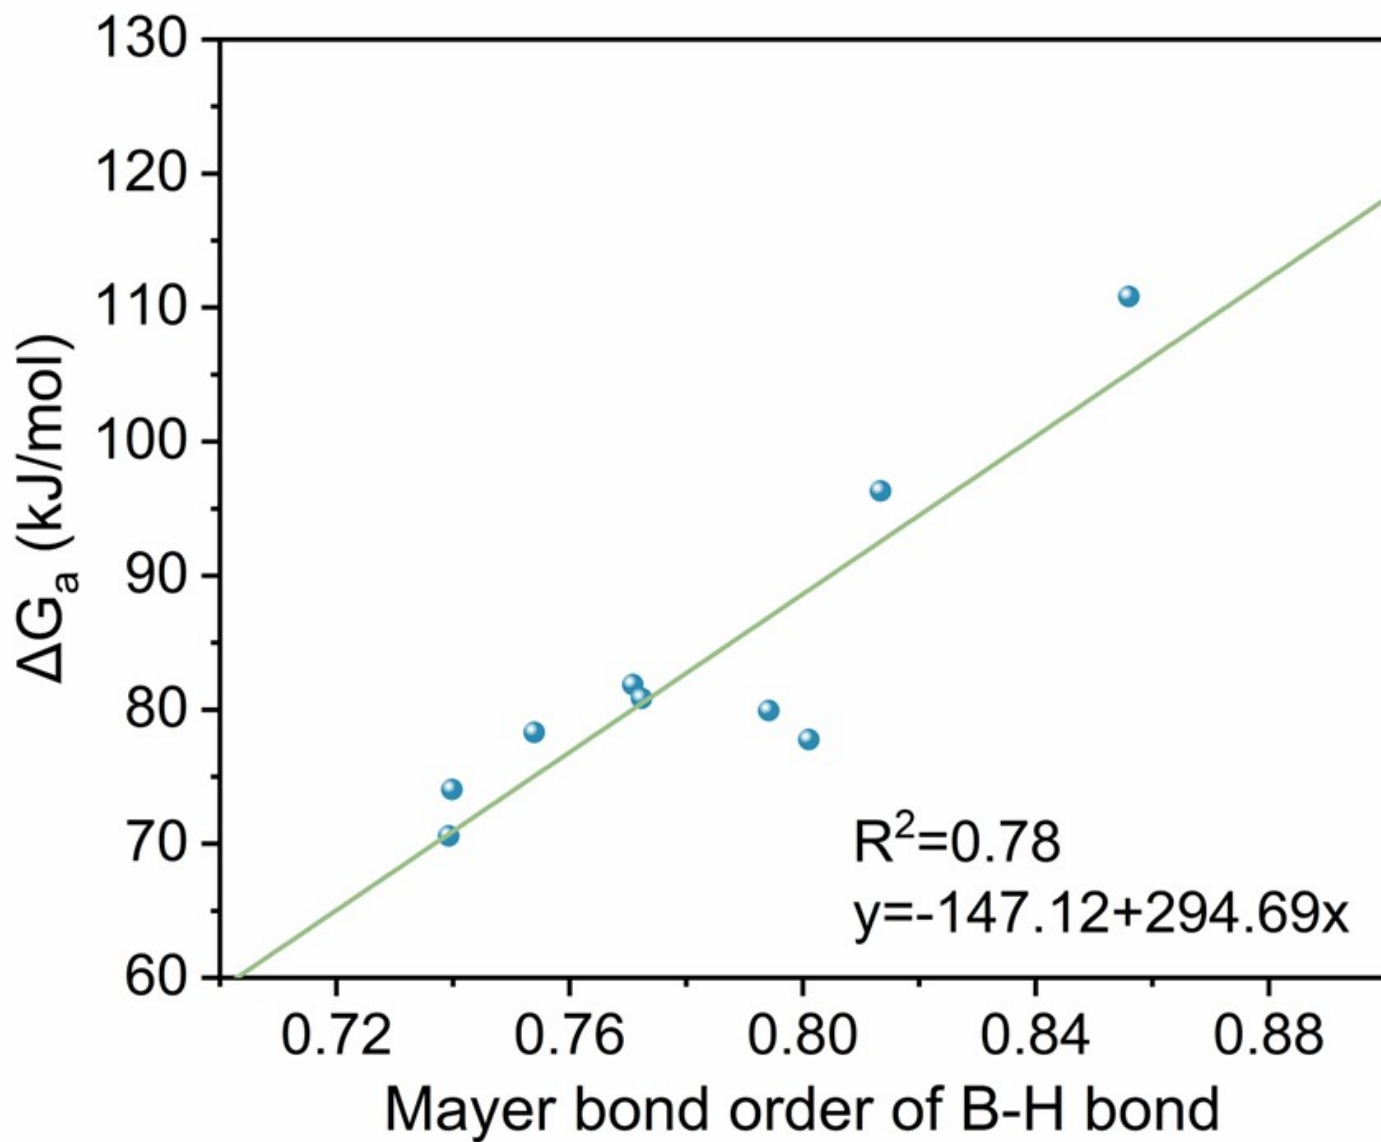

**Fig. S18** The relationship of dehydrogenation barrier of  $\text{LiBH}_4$  (002) surface and Mayer average bond order of the B-H bonds in the surface layer.



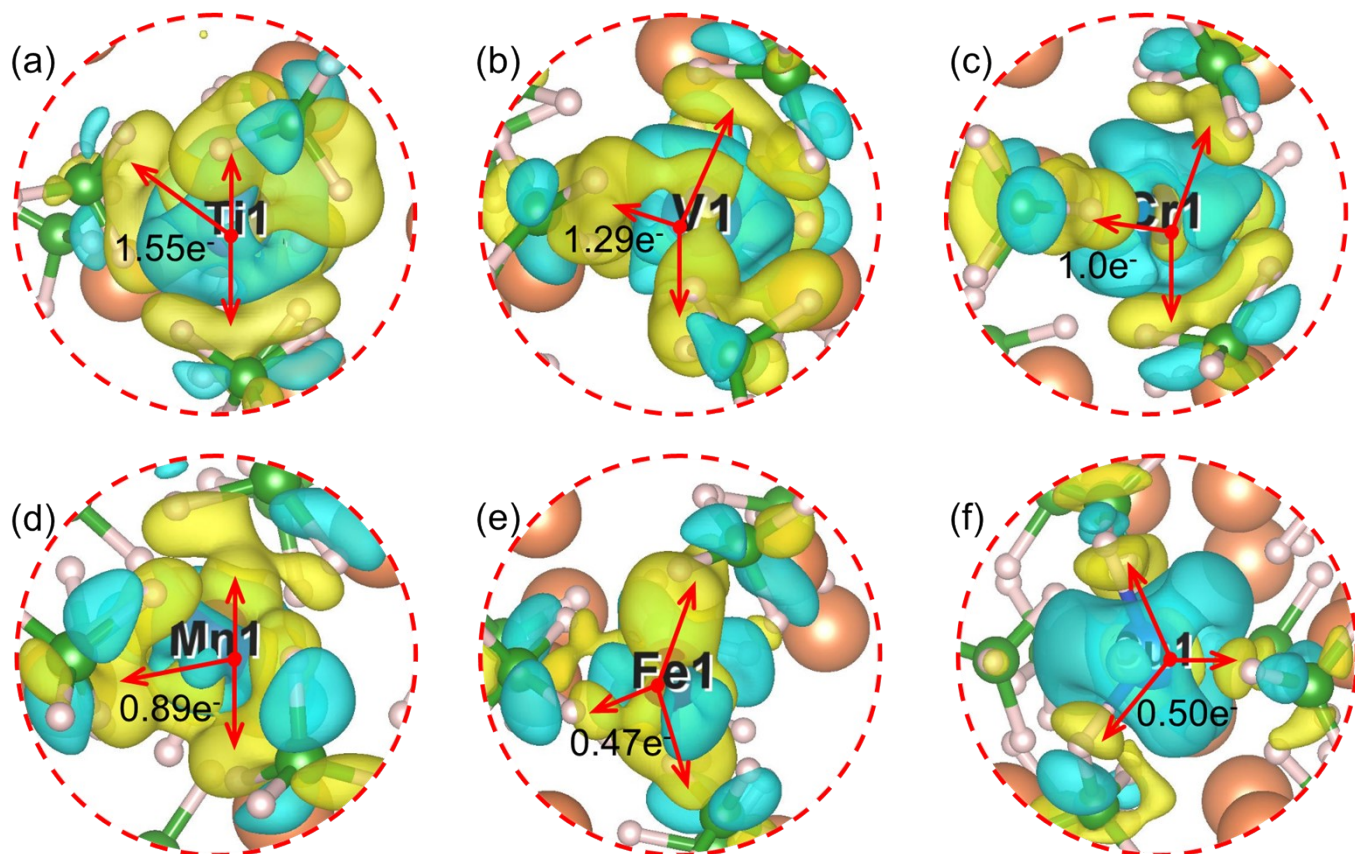

**Fig. S19** Electron density difference of doped transition metal (a)-(f) Ti, V, Cr, Mn, Fe and Cu. The yellow and blue isosurface indicate electron accumulation and loss, respectively. The result is plotted with an isovalue of 0.001 e Å<sup>-3</sup>, the red dot represents the position of transition metals and the red arrows represent the direction of electron transfer, white, yellow and green spheres represent H, Li, and B respectively.

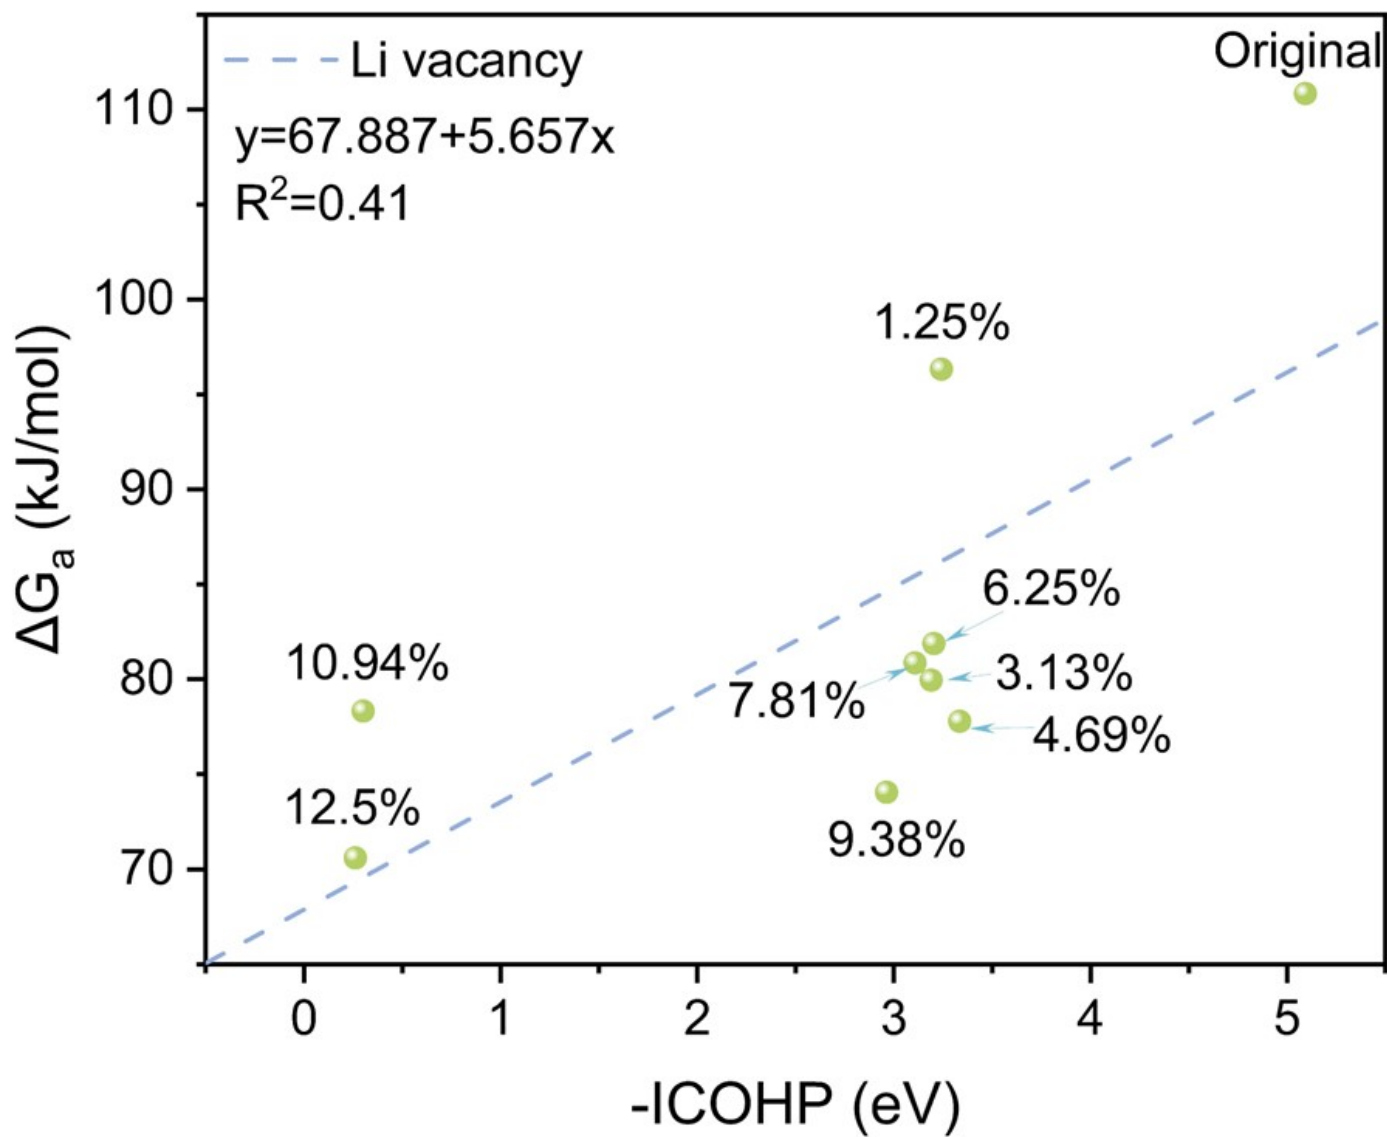

**Fig. S20** The relationship between dehydrogenation barrier of  $\text{LiBH}_4$  (002) and -ICOHP in the system of Li vacancy.

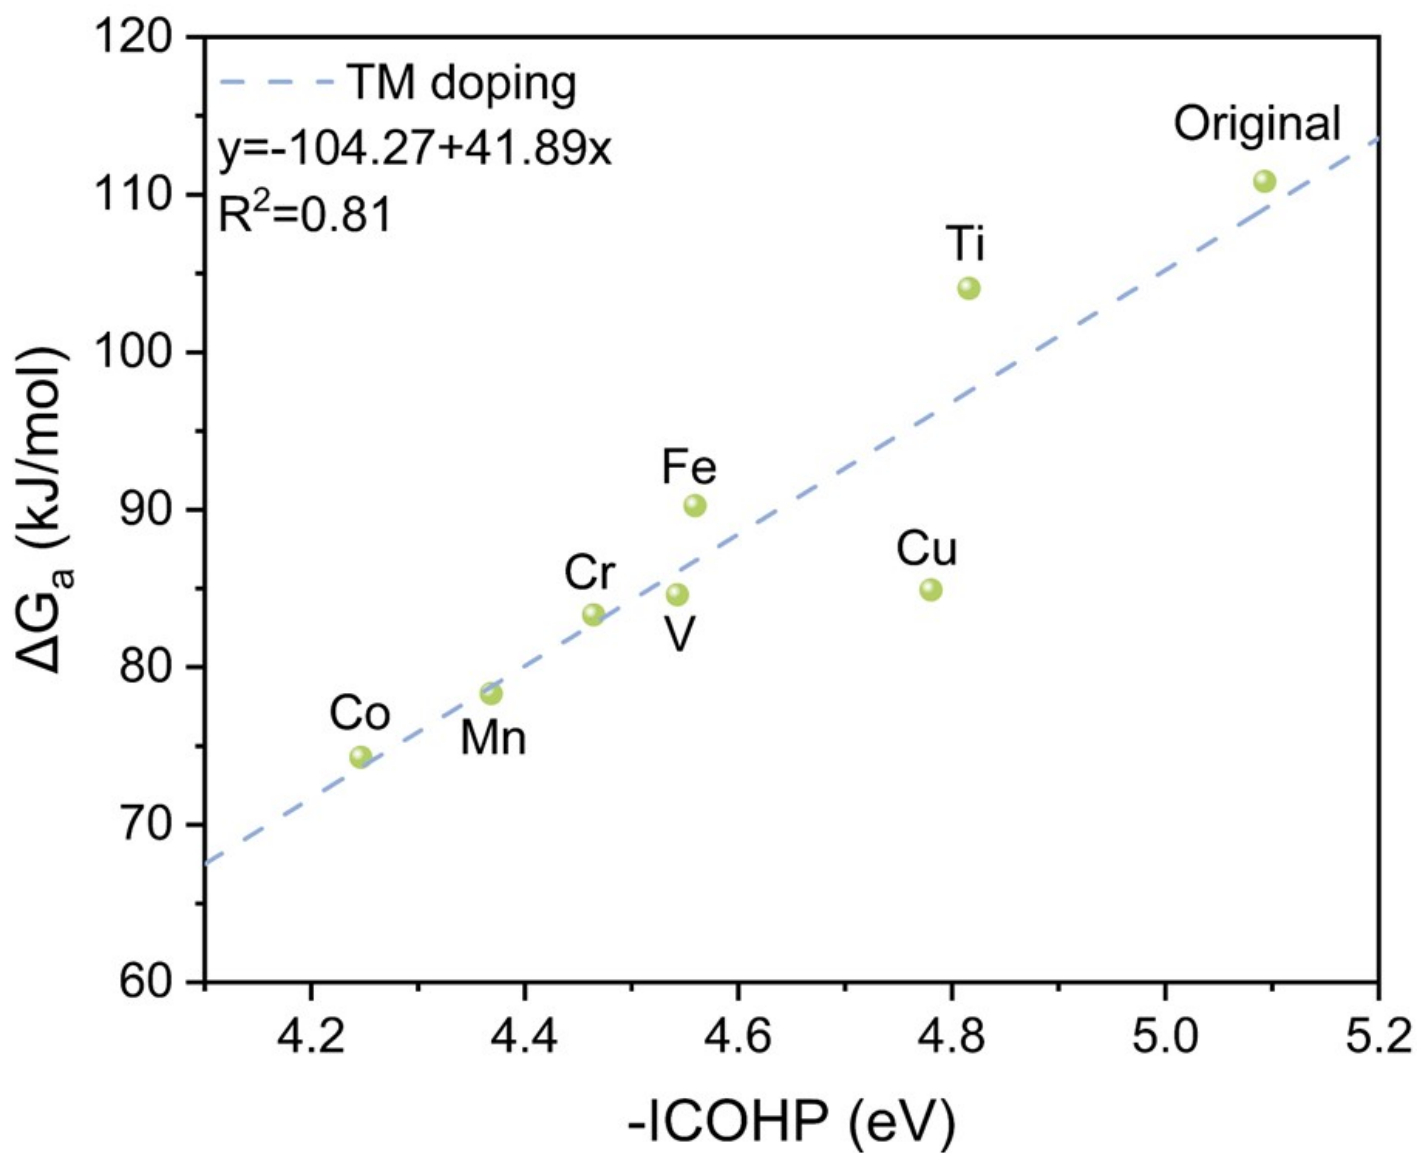

**Fig. S21** The relationship between dehydrogenation barrier of  $\text{LiBH}_4$  (002) and  $-ICOHP$  in the system of TM doping.

**Table. S6** AIMD simulation dynamic graphs of different surfaces of  $\text{LiBH}_4$

Surface

Movies

(002)

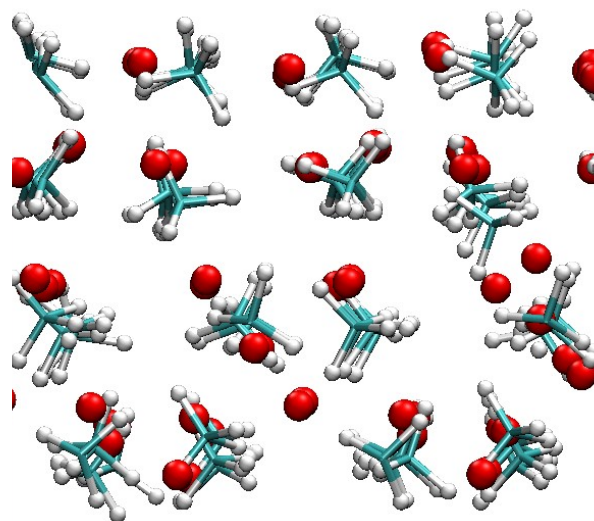

(020)

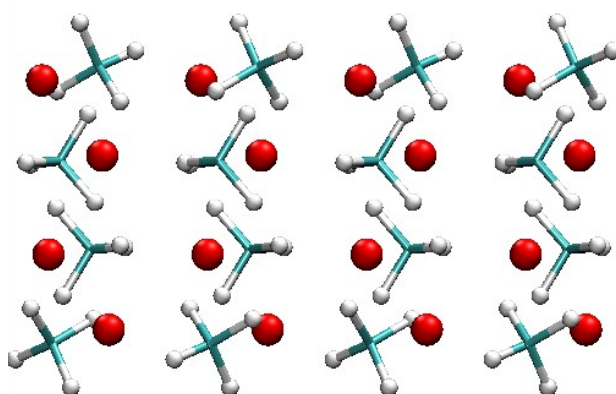

(011)

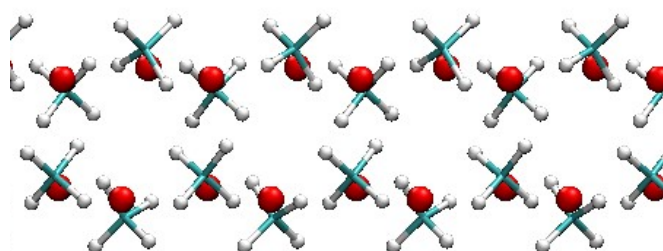

(200)

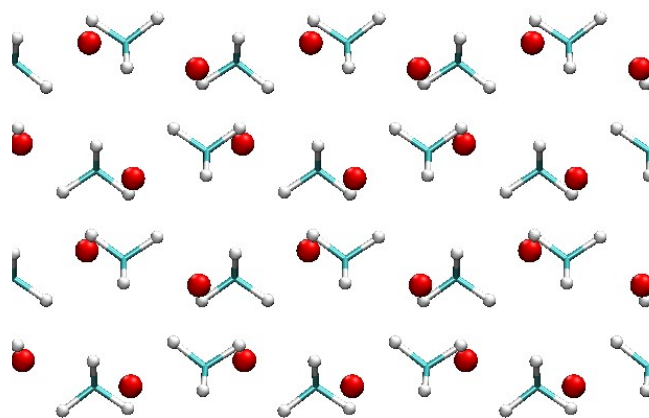

(101)

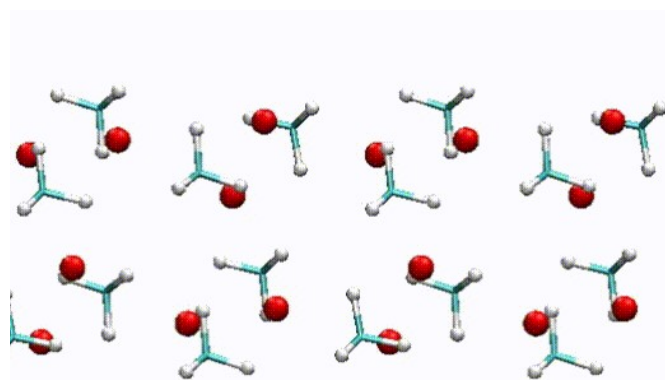

---

**Note:** the red sphere is Li, the connection of the green stick is B (for the convenience of highlighting the movement of H and Li, B is not displayed in a sphere), and the white sphere is H.

Table. S7 MD simulation dynamic graphs of LiBH<sub>4</sub> (002) surface with Li vacancy

The  
concentration of  
Li vacancy

Movies

1.56%

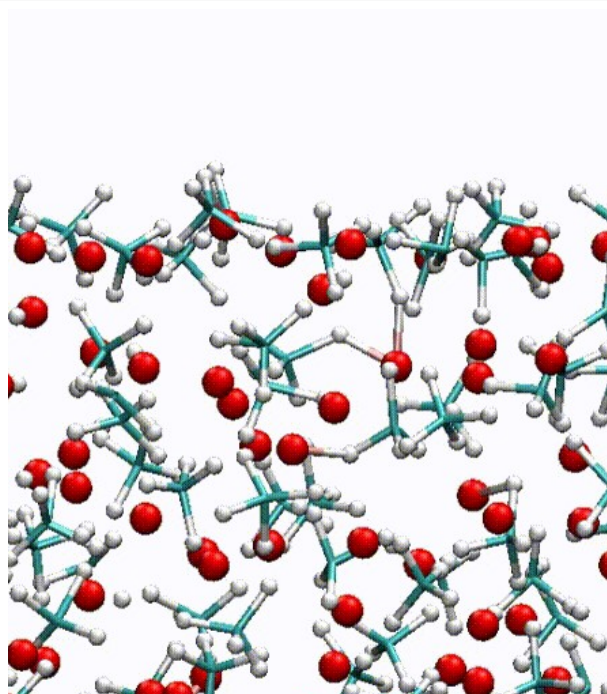

3.13%

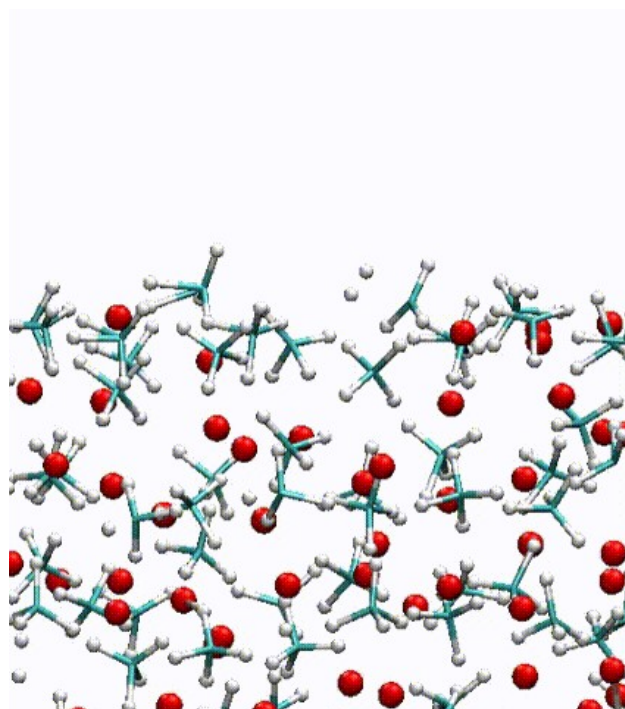



4.69%

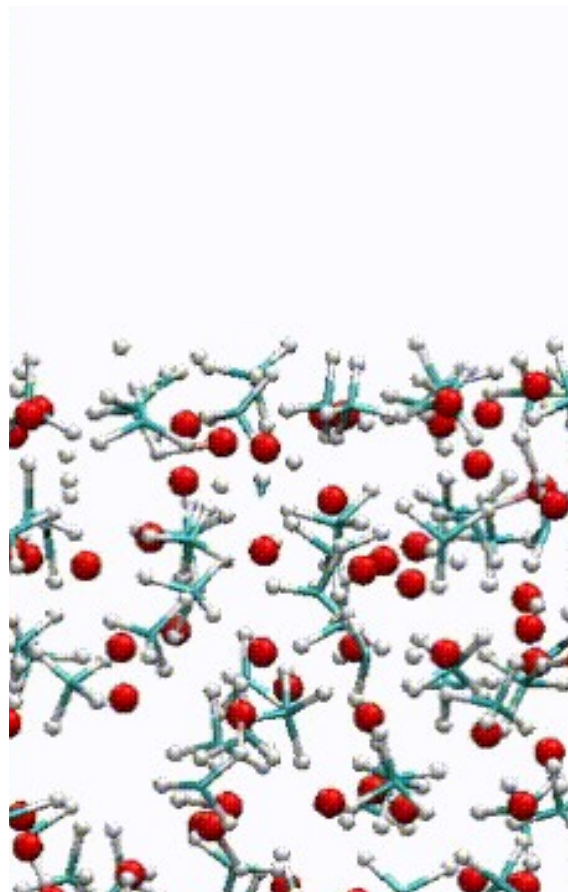

6.25%

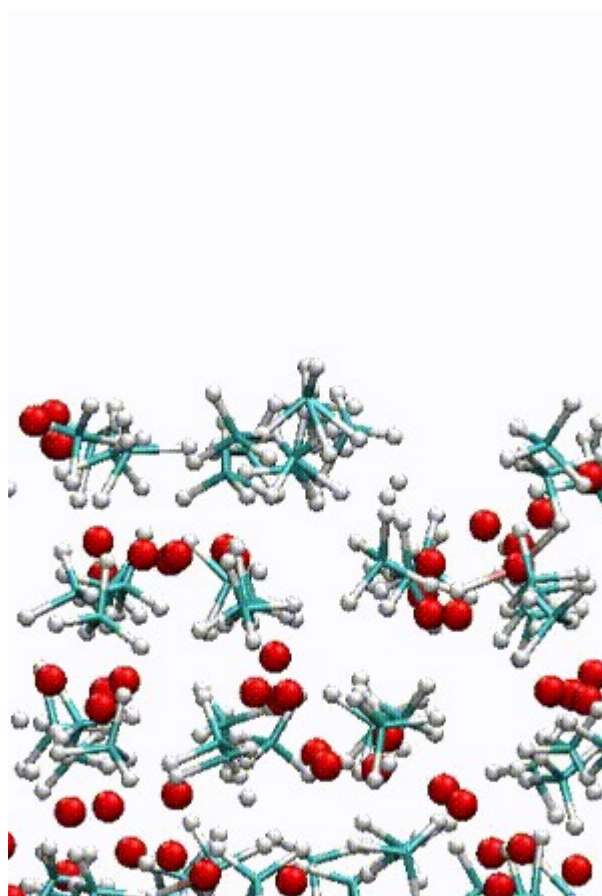

7.81%

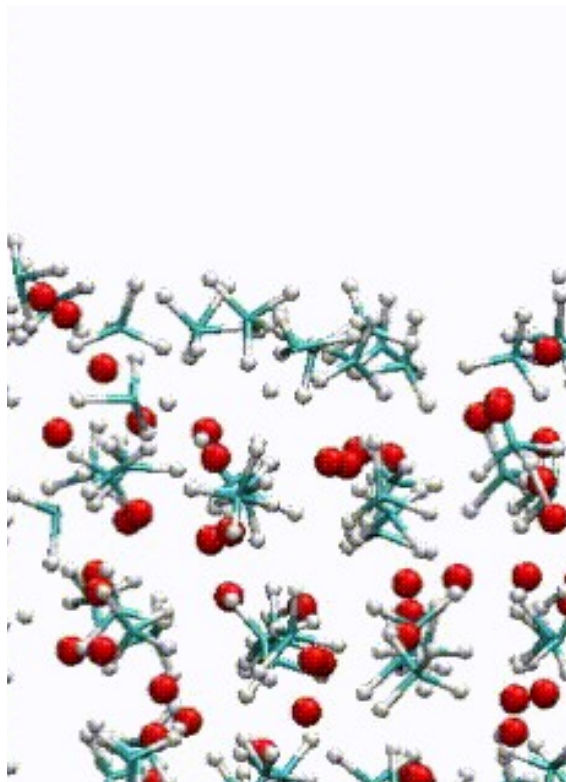

9.38%

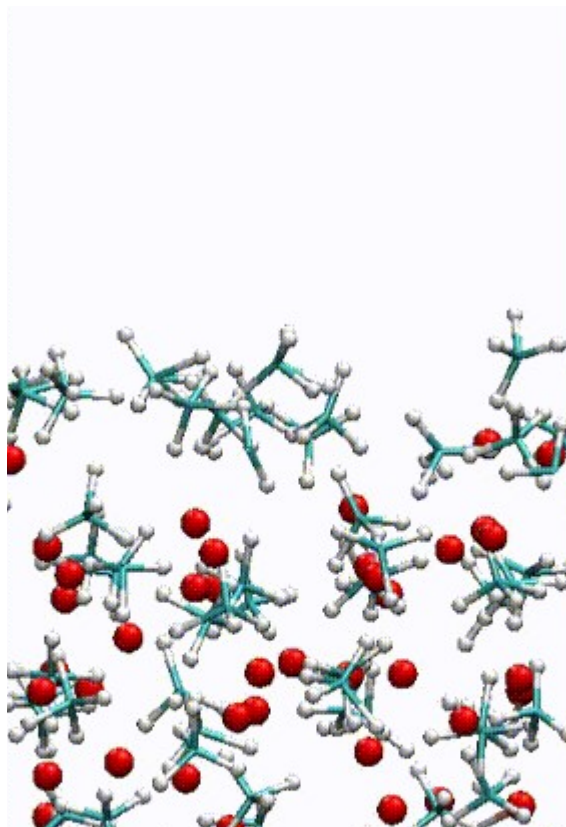

10.94%

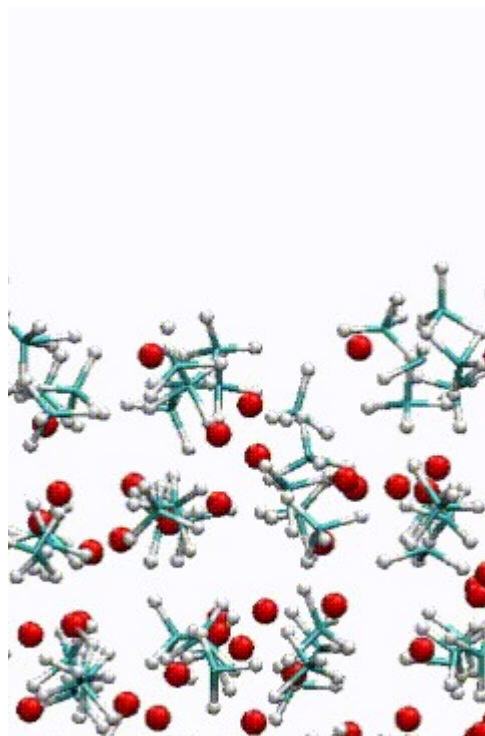

12.5%

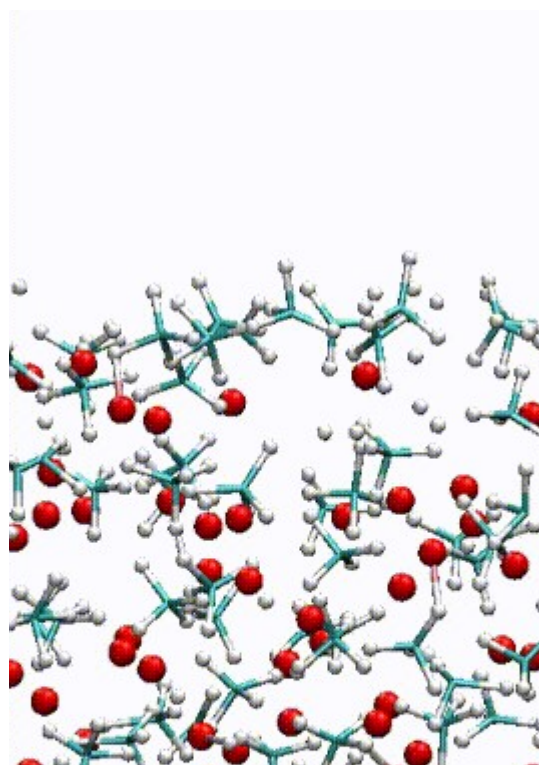

---

Note: the red sphere is Li, the connection of the green stick is B (for the convenience of highlighting the movement of H and Li, B is not displayed in a sphere), and the white sphere is H.

## References

- 1 A. Züttel, S. Rentsch, P. Fischer, P. Wenger, P. Sudan, P. Mauron and C. Emmenegger, *Journal of Alloys and Compounds*, 2003, **356-357**, 515-520.
- 2 J. K. Kang, S. Y. Kim, Y. S. Han, R. P. Muller and W. A. Goddard, III, *Applied Physics Letters*, 2005, **87**, 111904.
- 3 J. P. Soulié, G. Renaudin, R. Černý and K. Yvon, *Journal of Alloys and Compounds*, 2002, **346**, 200-205.
